# Supplementary material for: An easy access to topical gels of an anti-cancer prodrug (5-fluorouracil acetic acid) for self-drug-delivery applications
Source: Royal Society of Chemistry journal article supplement (doi:10.1039/c9cc03037a), 2019-01-01
Supplement: c9cc03037a1.pdf [file c9cc03037a1.pdf]

## **Supporting Information**

# ***An Easy Access to Topical Gels of an Anti-cancer Prodrug (5-Fluorouracil Acetic Acid) for Self-drug-delivery Applications***

Poulami Chakraborty and Parthasarathi Dastidar\*<sup>[a]</sup>

Email:ocpd@iacs.res.in

<sup>[a]</sup>Department of Organic Chemistry

Indian Association for the Cultivation of Science, 2A & 2B Raja

S. C. Mullick Road,

Jadavpur, Kolkata – 700032, West Bengal, India

## Materials, Methods and Synthesis

### Materials

All chemicals were commercially available and were used without any further purification. All solvents were of laboratory reagent (LR) grade and were used without any distillation. All the cell lines under study were purchased from the National Centre for Cell Science, (NCCS), Pune, India.

### Methods

The mass spectra was collected with a QTOF Micro YA263 instrument. FTIR spectra were recorded by a Perkin Elmer FTIR spectrometer (spectrometer two) instrument. Both  $^1\text{H}$  and  $^{13}\text{C}$  NMR spectra were recorded with 400 and 500 MHz spectrometers (BrukerUltrashield Plus-500). TEM images were captured with a JEOL JEM 2100F (for FEG-TEM) and JEOL JEM 2010/11 (for High Resolution Transmission Electron Microscopy (HR-TEM)) instrument using 300 mesh carbon coated copper TEM grids. Rheology studies were carried out with the Anton Paar Modular Compact Rheometer MCR 102. MTT assay was conducted using a multi-plate ELISA reader (Varioskan Flash Elisa Reader, Thermo Fisher).

### Synthesis of 5-FuA

5-Fluorouracilacetic acid (**5-FuA**) was synthesized using the reported procedure.<sup>[1]</sup> Aqueous solution (0.6 mL) of chloroacetic acid (3 mmol, 0.283 g) was added using a dropping funnel to an aqueous KOH (4 mmol, 0.224 g) solution (1.0 mL) of 5-fluorouracil (2 mmol, 0.260 gm) under stirring condition at room temperature. After complete addition of the chloroacetic acid solution, the reaction mixture was heated to 50 °C in an oil-bath under stirring condition for 8 H maintaining pH 10 of the reaction mixture by adding KOH solution (10 M) as and when required. The reaction mixture was finally acidified by conc. HCl to get the product as a precipitate (0.300 gm, ~80% yield) (Figure S1).

- 
1. M. Li, Z. Liang, X. Sun, T. Gong, Z. Zhang, *PLOS ONE* **2014**, 9, 1-13.

## Synthesis of the Salts

The PAM salts (Scheme 2) were synthesized by reacting **5-FuA** with the corresponding primary amines in 1:1 molar ratio in MeOH at room temperature. In a typical experiment, calculated amount of the reactants was taken in a beaker (25 ml). MeOH (~10 ml) was added to it followed by half an hour sonication to make the solution homogeneous. The beaker was then kept overnight in open air at room temperature to obtain the salt.

## Physicochemical Data

**5-FuA**: White Solid;  $^1\text{H}$  NMR (400 MHz, DMSO- $\text{D}_6$ )  $\delta$  11.92 (s, 1H), 8.06-8.05 (d,  $J = 6.6$  Hz, 1H), 4.35 (s, 2H) ppm.  $^{13}\text{C}$  NMR (100 MHz, DMSO- $\text{D}_6$ )  $\delta$  169.3, 157.7, 149.7, 140.5, 138.2, 130.4, 48.7 ppm.(Figure S3); HRMS, ESI ( $\text{CH}_3\text{OH}$ )  $m/z$  (100%): Calculated for  $[(\text{C}_6\text{H}_5\text{FN}_2\text{O}_4)][\text{M}+\text{H}]^+$ : 189.03; found: 189.03.

**FuA-3**: White Solid; Elemental analysis calculated (%) for  $\text{C}_9\text{H}_{14}\text{FN}_3\text{O}_4$ : C 43.72, H 5.71, N 17.00; found: C 43.35, H 5.80, N 16.97;  $^1\text{H}$  NMR (500 MHz, DMSO- $\text{D}_6$ )  $\delta$  7.96-7.94 (d,  $J = 6.9$  Hz, 1H), 4.07 (s, 2H), 2.73 – 2.70 (m, 2H), 1.58 – 1.50 (m, 2H), 0.91-0.88 (t,  $J = 7.5$  Hz, 3H) ppm.  $^{13}\text{C}$  NMR (100 MHz, DMSO- $\text{D}_6$ )  $\delta$  169.5, 157.6, 149.6, 140.1, 137.8, 131.3, 49.8, 40.3, 20.4, 10.8 ppm.(Figure S4).

**FuA-4**: White Solid; Elemental analysis calculated (%) for  $\text{C}_{10}\text{H}_{16}\text{FN}_3\text{O}_4$ : C 45.97, H 6.17, N 16.08; found: C 45.58, H 5.74, N 15.73;  $^1\text{H}$  NMR (500 MHz, DMSO- $\text{D}_6$ )  $\delta$  7.91-7.90 (d,  $J = 6.9$  Hz, 1H), 3.97 (s, 2H), 2.76 – 2.73 (m, 2H), 1.53 – 1.47 (m, 2H), 1.35-1.27 (m, 2H), 0.89-0.86 (t,  $J = 7.3$  Hz, 3H) ppm.  $^{13}\text{C}$  NMR (100 MHz, DMSO- $\text{D}_6$ )  $\delta$  169.4, 157.6, 149.6, 139.9, 137.6, 131.8, 50.6, 38.2, 29.2, 19.1, 13.4 ppm.(Figure S5).

**FuA-5**: White Solid; Elemental analysis calculated (%) for  $\text{C}_{11}\text{H}_{18}\text{FN}_3\text{O}_4$ : C 47.99, H 6.59, N 15.26; found: C 47.54, H 6.32, N 15.63;  $^1\text{H}$  NMR (500 MHz, DMSO- $\text{D}_6$ )  $\delta$  7.89-7.86 (dd,  $J = 6.7, 4.5$  Hz, 1H), 3.92-3.91 (d,  $J = 7.1$  Hz, 2H), 2.74-2.71 (t,  $J = 7.3$  Hz, 2H), 1.54 – 1.49 (m, 2H), 1.28 – 1.27 (m, 4H), 0.88-0.85 (t,  $J = 6.9$  Hz, 3H) ppm.  $^{13}\text{C}$  NMR (100 MHz, DMSO- $\text{D}_6$ )  $\delta$  169.5, 157.4, 149.7, 139.9, 137.6, 131.5, 50.7, 38.6, 28.0, 26.8, 21.6, 13.6 ppm. (Figure S6).

**FuA-6**: White Solid; Elemental analysis calculated (%) for  $\text{C}_{12}\text{H}_{20}\text{FN}_3\text{O}_4$ : C 49.82, H 6.97, N 14.52; found: C 49.48, H 6.58, N 14.81;  $^1\text{H}$  NMR (500 MHz, DMSO- $\text{D}_6$ )  $\delta$  7.89-7.87 (d,  $J = 7.0$

Hz, 1H), 3.93 (s, 2H), 2.75-2.72 (t,  $J = 7.3$  Hz, 2H), 1.52-1.48 (m, 2H), 1.28 – 1.26 (m, 6H), 0.88-0.85 (t,  $J = 6.7$  Hz, 3H).  $^{13}\text{C}$  NMR (100 MHz, DMSO- $\text{D}_6$ )  $\delta$  169.7, 157.6, 149.7, 139.9, 137.6, 131.6, 50.8, 30.7, 27.4, 27.2, 25.5, 21.8, 13.8 ppm. (Figure S7).

**FuA-7:** White Solid; Elemental analysis calculated (%) for  $\text{C}_{13}\text{H}_{22}\text{FN}_3\text{O}_4$  : C 51.48, H 7.31, N 13.85; found : C 51.83, H 7.72, N 14.00;  $^1\text{H}$  NMR (500 MHz, DMSO- $\text{D}_6$ )  $\delta$  8.97 (s, 1H), 7.90-7.89 (d,  $J = 7.0$  Hz, 1H), 3.94 (s, 2H), 2.73 – 2.70 (m, 2H), 1.52-1.48 (m, 2H), 1.28 – 1.26 (m, 8H), 0.87-0.85 (t,  $J = 6.9$  Hz, 3H) ppm.  $^{13}\text{C}$  NMR (125 MHz, DMSO- $\text{D}_6$ )  $\delta$  169.1, 157.3, 149.6, 139.6, 137.8, 131.5, 50.6, 38.7, 30.9, 28.1, 27.2, 25.7, 21.8, 13.8 ppm. (Figure S8).

**FuA-8:** White Solid; Elemental analysis calculated (%) for  $\text{C}_{14}\text{H}_{24}\text{FN}_3\text{O}_4$  : C 52.98, H 7.62, N 13.24; found : C 52.53, H 7.66, N 13.28;  $^1\text{H}$  NMR (500 MHz, DMSO- $\text{D}_6$ )  $\delta$  9.01 (s, 1H), 7.90-7.89 (d,  $J = 7.0$  Hz, 1H), 3.94 (s, 2H), 2.74 – 2.71 (m, 2H), 1.54-1.48 (m, 2H), 1.29 – 1.25 (m, 10H), 0.87-0.85 (t,  $J = 6.8$  Hz, 3H) ppm.  $^{13}\text{C}$  NMR (125 MHz, DMSO- $\text{D}_6$ )  $\delta$  169.0, 157.5, 149.6, 139.6, 137.8, 131.8, 50.6, 40.1, 38.6, 31.0, 28.4, 27.2, 25.8, 21.9, 13.8 ppm. (Figure S9).

**FuA-9:** White Solid; Elemental analysis calculated (%) for  $\text{C}_{15}\text{H}_{26}\text{FN}_3\text{O}_4$  : C 54.37, H 7.91, N 12.68; found : C 54.04, H 7.39, N 12.51;  $^1\text{H}$  NMR (500 MHz, DMSO- $\text{D}_6$ )  $\delta$  7.88-7.87 (d,  $J = 6.8$  Hz, 1H), 3.91 (s, 2H), 2.74 – 2.71 (m, 2H), 1.52-1.47 (m, 2H), 1.29 – 1.25 (m, 12H), 0.87-0.84 (t,  $J = 6.9$  Hz, 3H) ppm.  $^{13}\text{C}$  NMR (100 MHz, DMSO- $\text{D}_6$ )  $\delta$  169.2, 157.3, 149.6, 140.0, 137.7, 131.3, 50.3, 38.6, 31.2, 28.7, 28.5, 28.5, 27.0, 25.8, 22.0, 13.9 ppm. (Figure S10).

**FuA-10:** White Solid; Elemental analysis calculated (%) for  $\text{C}_{16}\text{H}_{28}\text{FN}_3\text{O}_4$  : C 55.64, H 8.17, N 12.17; found : C 55.34, H 8.57, N 12.48;  $^1\text{H}$  NMR (500 MHz, DMSO- $\text{D}_6$ )  $\delta$  7.87-7.86 (d,  $J = 7.0$  Hz, 1H), 3.90 (s, 2H), 2.73 – 2.70 (m, 2H), 1.51-1.47 (m, 2H), 1.29-1.24 (d,  $J = 20.5$  Hz, 14H), 0.87-0.84 (t,  $J = 6.8$  Hz, 3H) ppm.  $^{13}\text{C}$  NMR (100 MHz, DMSO- $\text{D}_6$ )  $\delta$  169.4, 157.7, 149.8, 139.9, 137.7, 131.9, 50.9, 31.3, 28.9, 28.8, 28.6, 28.6, 27.8, 27.7, 25.9, 22.1, 13.9 ppm. (S11).

**FuA-11:** White Solid; Elemental analysis calculated (%) for  $\text{C}_{17}\text{H}_{30}\text{FN}_3\text{O}_4$  : C 56.81, H 8.41, N 11.69; found : C 56.53, H 8.31, N 11.25;  $^1\text{H}$  NMR (500 MHz, DMSO- $\text{D}_6$ )  $\delta$  7.88-7.86 (d,  $J = 7.0$  Hz, 1H), 3.91 (s, 2H), 2.74 – 2.71 (m, 2H), 1.51-1.47 (m, 2H), 1.27-1.24 (d,  $J = 13.4$  Hz, 16H), 0.87-0.84 (t,  $J = 6.8$  Hz, 3H) ppm.  $^{13}\text{C}$  NMR (100 MHz, DMSO- $\text{D}_6$ )  $\delta$  169.4, 157.6, 149.7, 139.9, 137.6, 131.8, 50.7, 38.6, 31.2, 28.9, 28.9, 28.8, 28.6, 28.5, 27.2, 25.8, 22.0, 13.8 ppm. (S12).

**FuA-12:** White Solid; Elemental analysis calculated (%) for  $C_{18}H_{32}FN_3O_4$  : C 57.89, H 8.64, N 11.25; found : C 57.49, H 9.0, N 10.84;  $^1H$  NMR (500 MHz, DMSO- $D_6$ )  $\delta$  9.01 (s, 1H), 7.90-7.89 (d,  $J = 6.9$  Hz, 1H), 3.95 (s, 2H), 2.73-2.70 (t,  $J = 7.5$  Hz, 2H), 1.52-1.48 (m, 2H), 1.24 (s, 18H), 0.87-0.84 (t,  $J = 6.6$  Hz, 3H) ppm.  $^{13}C$  NMR (125 MHz, DMSO- $D_6$ )  $\delta$  169.0, 157.3, 149.6, 139.6, 137.8, 131.8, 50.6, 38.6, 31.2, 28.9, 28.9, 28.8, 28.7, 28.6, 28.4, 27.2, 25.8, 21.9, 13.8 ppm.(Figure S13).

**FuA-14:** White Solid; Elemental analysis calculated (%) for  $C_{20}H_{36}FN_3O_4$  : C 59.83, H 9.04, N 10.47; found : C 60.01, H 8.83, N 10.64;  $^1H$  NMR (400 MHz, DMSO- $D_6$ )  $\delta$  7.87-7.85 (m, 1H), 3.91-3.90 (d,  $J = 3.8$  Hz, 2H), 2.74-2.71 (t,  $J = 7.4$  Hz, 2H), 1.51-1.46 (m, 2H), 1.28-1.24 (m, 22H), 0.87-0.83 (t,  $J = 6.8$  Hz, 3H) ppm.  $^{13}C$  NMR (125 MHz, DMSO- $D_6$ )  $\delta$  169.2, 157.7, 149.7, 139.7, 137.9, 131.9, 50.7, 38.7, 31.3, 29.0, 28.9, 28.9, 28.7, 28.6, 27.1, 25.9, 22.1, 14.0 ppm.(S14).

**FuA-15:** White Solid; Elemental analysis calculated (%) for  $C_{21}H_{38}FN_3O_4$  : C 60.70, H 9.22, N 10.11; found : C 60.29, H 9.59, N 9.82;  $^1H$  NMR (400 MHz, DMSO- $D_6$ )  $\delta$  7.87-7.85 (d,  $J = 7.0$  Hz, 1H), 3.89 (s, 2H), 2.74 – 2.70 (m, 2H), 1.53 – 1.46 (m, 2H), 1.23 (s, 24H), 0.87-0.83 (t,  $J = 6.8$  Hz, 3H) ppm.  $^{13}C$  NMR (100 MHz, DMSO- $D_6$ )  $\delta$  168.6, 157.4, 149.7, 139.8, 137.6, 131.8, 50.9, 31.3, 29.0, 29.0, 28.9, 28.8, 28.7, 28.6, 27.4, 25.9, 22.1,14.0 ppm. (Figure S15).

**FuA-16:** White Solid; Elemental analysis calculated (%) for  $C_{22}H_{40}FN_3O_4$  : C 61.51, H 9.39, N 9.78; found : C 61.24, H 9.31, N 9.58;  $^1H$  NMR (400 MHz, DMSO- $D_6$ )  $\delta$  7.87-7.85 (d,  $J = 7.0$  Hz, 1H), 3.90 (s, 2H), 2.75 – 2.71 (m, 2H), 1.51 – 1.46 (m, 2H), 1.23 (s, 26H), 0.87-0.83 (t,  $J = 6.8$  Hz, 3H) ppm.  $^{13}C$  NMR (100 MHz, DMSO- $D_6$ )  $\delta$  168.7, 157.5, 149.7, 139.9, 137.6, 132.1, 50.9, 31.3, 29.0, 29.0, 28.9, 28.8, 28.7, 28.6, 27.3, 25.8, 22.1, 14.0 ppm. (Figure S16).

**FuA-18:** White Solid; Elemental analysis calculated (%) for  $C_{24}H_{44}FN_3O_4$  : C 62.99, H 9.69, N 9.18; found : C 62.67, H 9.47, N 8.97;  $^1H$  NMR (400 MHz, DMSO- $D_6$ )  $\delta$  7.91-7.89 (d,  $J = 7.0$  Hz, 1H), 3.97 (s, 2H), 2.74 – 2.70 (m, 2H), 1.52-1.47 (m, 2H), 1.23 (s, 30H), 0.87-0.83 (t,  $J = 6.6$  Hz, 3H) ppm.  $^{13}C$  NMR (125 MHz, DMSO- $D_6$ )  $\delta$  169.0, 162.4, 157.4, 149.7, 139.9, 131.4, 72.3, 49.9, 49.8, 40.1, 38.8, 35.8, 31.3, 30.8, 29.0, 29.0, 28.9, 28.8, 28.7, 28.5, 27.0, 25.8, 22.1, 13.9 ppm.(Supporting Information, Figure S17).

## **Gelation and $T_{\text{gel}}$ experiments**

The hydrogels as well as the organogels were prepared by dissolving the gelator salts in pure water (hydrogel) or in the corresponding organic solvent (organogel) by heating and then keeping it at room temperature. Most of the gels were formed within a few minutes. The gel formation was confirmed by tube inversion method wherein the gel was found to withstand its own weight against gravity. Minimum gelator concentration (MGC) was determined by gradually diluting a 4 wt % w/v gel till gel formation was ceased. Dropping ball method was employed to determine  $T_{\text{gel}}$  (gel to sol dissociation temperature). In a typical experiment, a glass ball (weighing 216.4 mg) was carefully placed on a gel bed (1 ml, at MGC) prepared in a test tube (internal diameter –11mm) and immersed in an oil bath fitted with a thermometer. The oil bath was gradually heated and the temperature at which the ball touched the bottom of the test tube was recorded as the  $T_{\text{gel}}$ .

## **Microscopy**

A small amount of freshly prepared gel (at MGC) was scooped and carefully smeared on carbon-coated Cu grids (300 mesh) and dried overnight under ambient condition. The images were recorded at an accelerating voltage of 200 kV without staining.

## **Rheology studies**

A small amount of freshly prepared gel (4 wt %, w/v) was scooped and placed on the stationary plate of the rheometer and parallel plate geometry (diameter - 25 mm, 1 mm gap) was employed to carry out the rheological experiments.

## **X-ray Diffraction**

X-ray quality single crystals of the salts (**FuA-9, FuA-10, FuA-11, FuA-12, FuA-14, FuA-15**) were grown at room temperature by slow evaporation technique from various solvent systems (Table S2). Single crystal X-ray diffraction data were collected using various diffractometer (Bruker APEX II, CCD area detector, Mo  $K_{\alpha}$ ,  $\lambda = 0.7107 \text{ \AA}$ , Bruker APEX III D8 Venture, PHOTON II detector, Cu  $K_{\alpha}$ ,  $\lambda = 1.54184 \text{ \AA}$ ). Data collection, data reduction, structure solution and refinement were carried out using the software packages of the corresponding diffractometer. All the structures were solved by direct methods and refined in a routine manner.

Hydrogen atoms were geometrically fixed. All the non-hydrogen atoms were treated anisotropically. CCDC-numbers 1868726, 1868727, 1868722, 1868723, 1868725, 1868724 contain the crystallographic data for **FuA-9**, **FuA-10**, **FuA-11**, **FuA-12**, **FuA-14** and **FuA-15** respectively. These data can be obtained free of charge from The Cambridge Crystallographic Data Centre via [www.ccdc.cam.ac.uk/data\\_request/cif](http://www.ccdc.cam.ac.uk/data_request/cif).

### **MTT assay**

The cells were grown in high-glucose DMEM (Dulbecco's modified Eagle's medium) supplemented with 10% fetal bovine serum (FBS) and 1% penicillin and streptomycin in a humidified incubator at 37<sup>0</sup> C and under 5% CO<sub>2</sub> atmosphere. For MTT assay, the cells were then seeded in a 96-well plate for each experiment at a density of approximately 0.5×10<sup>4</sup> cells per well. After incubating it for 24 h in a humidified incubator, various concentrations of the gelator salts or DMEM alone (control experiment) were applied to the cells and the mixtures were kept at 37<sup>0</sup> C under 5% CO<sub>2</sub> atmosphere for 72 h (for 36 h in case of B16F10 cell line). Then the culture medium of each well of the 96-well plate was replaced by the MTT reagent (3-(4,5-dimethylthiazol-2-yl)-2,5-diphenyltetrazolium bromide; 100 µl) containing media and it was left for one and half hour under incubation followed by replacing the media by DMSO (100 µl) with gentle shaking in order to dissolve the formazan produced by mitochondrial reductase of the live cell. The colourintensity of formazan (purple) attributing to the live cell concentration (cell viability) was measured by using a multi-plate ELISA reader at 570 nm. The percentage of cells, alive in presence of the gelator, was calculated by considering the DMEM-treated sample (control) as 100%. All these experiments were done in triplicate.

### **Cell Migration Experiment**

For B16F10 and Hep G2 cell lines, cells were seeded in a 6-well plate and kept for 1 day until the plates become almost confluent. A narrow path in the middle of the plate was created by scratching uniformly with a 200 µL sterile pipette tip. The IC<sub>50</sub> concentration of the gelator compounds were added to the cells. For the control experiment, no gelator salt was added. Still images were captured under an optical microscope (OLYMPUS CKX31) after different time intervals for 16 h (B16F10) and 72 h (HepG2) to measure migration speed for each case.

## Hydrogel Leaching Experiment

2.5 wt% of **FuA-15** hydrogel (3 ml) was incubated with 3 ml of 1X PBS solution (3 ml) over the gel surface. The release was observed up to 30 hours for time intervals at 3, 6, 9, 12, 24 and 30 hour by taking an aliquot of 200  $\mu$ l (from the PBS solution) each time and recording the UV spectrophotometry after appropriate dilution.

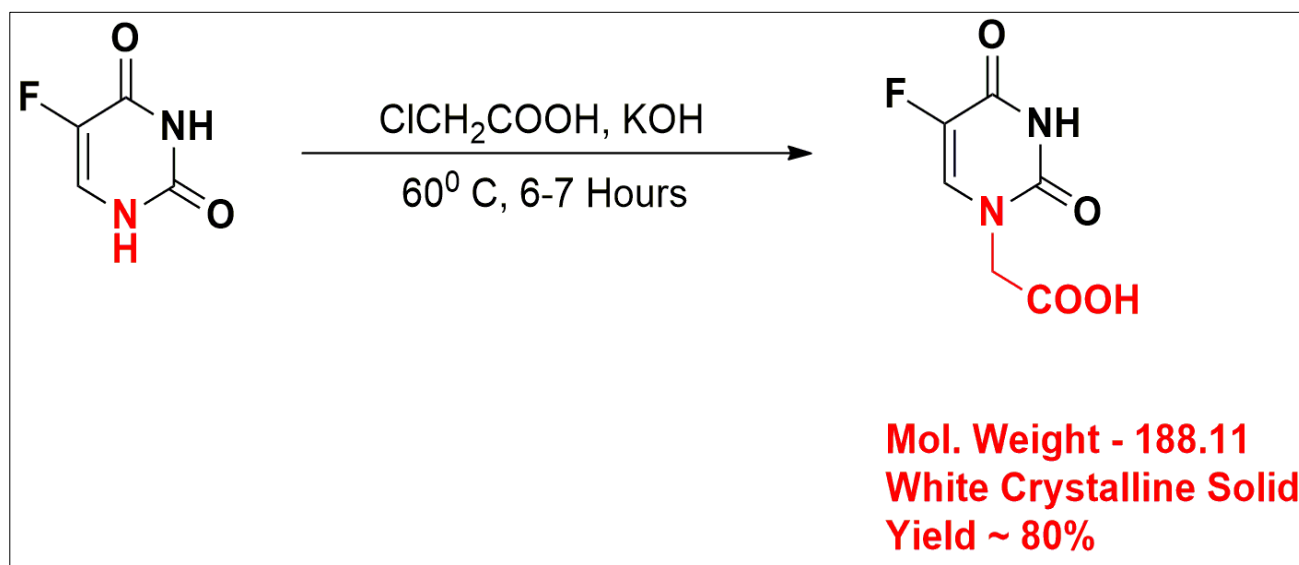

**Figure S1:** Synthesis Scheme of **5-FuA** (Acid).



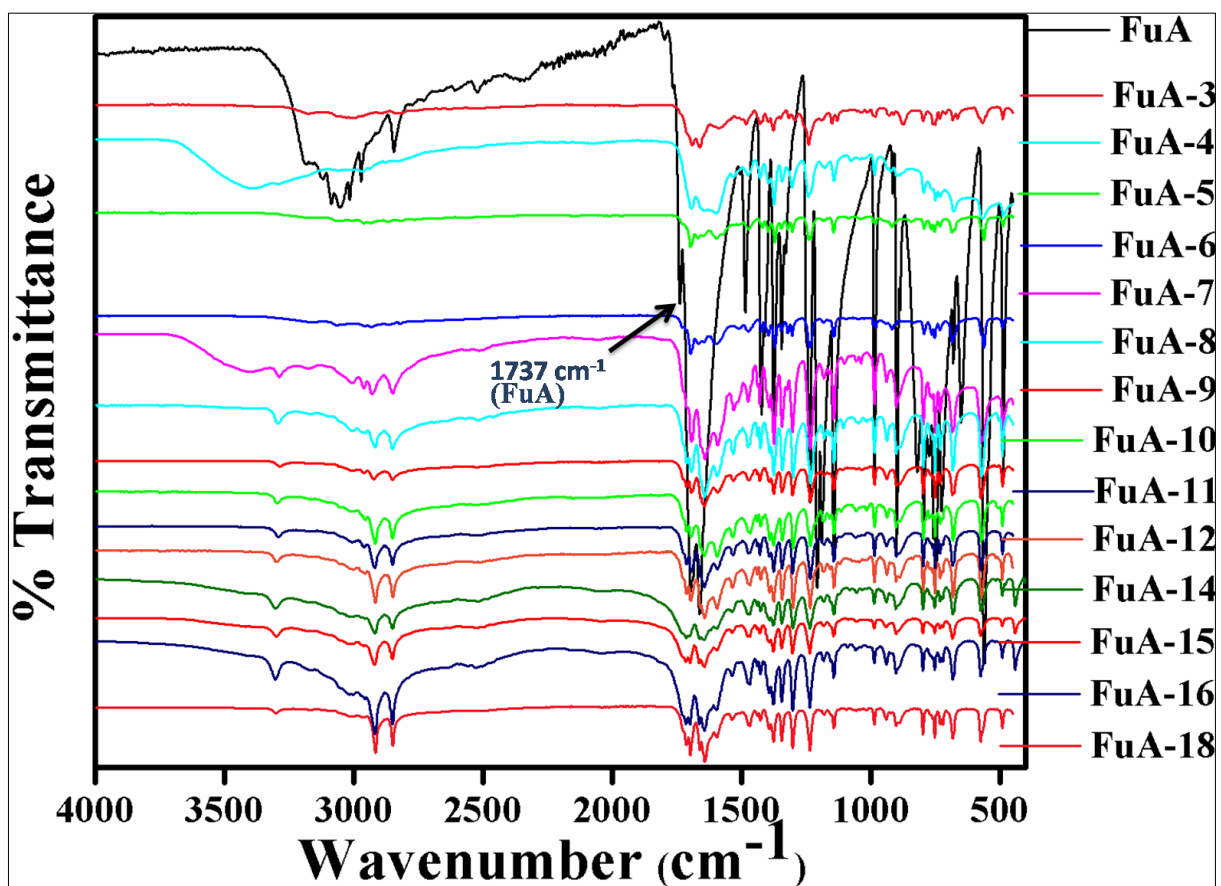

**Figure S2:** IR data comparison between the acid (**5-FuA**) and the salts (**FuA-3toFuA-18**) proving the formation of salts.

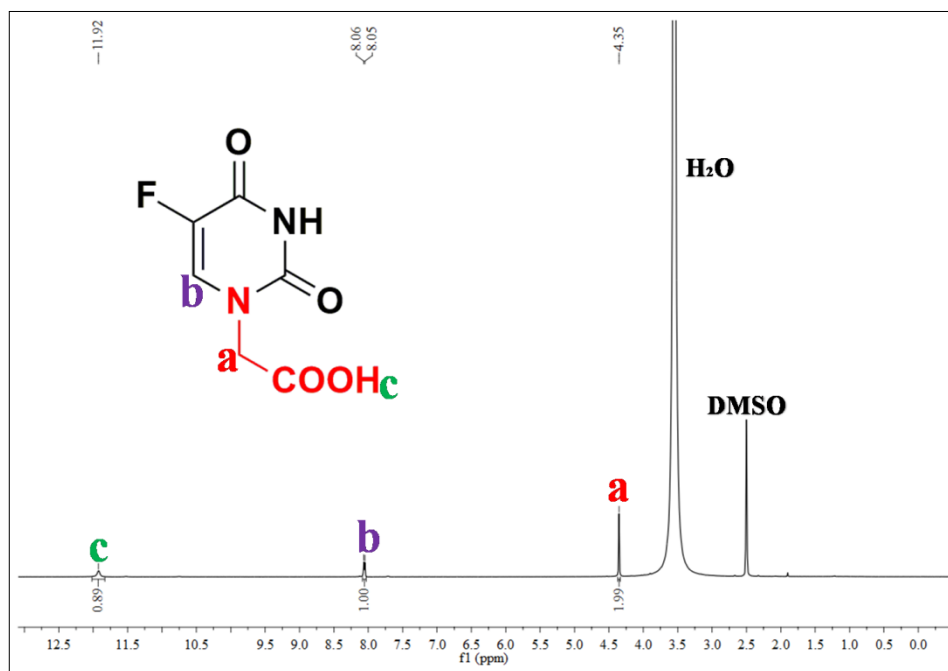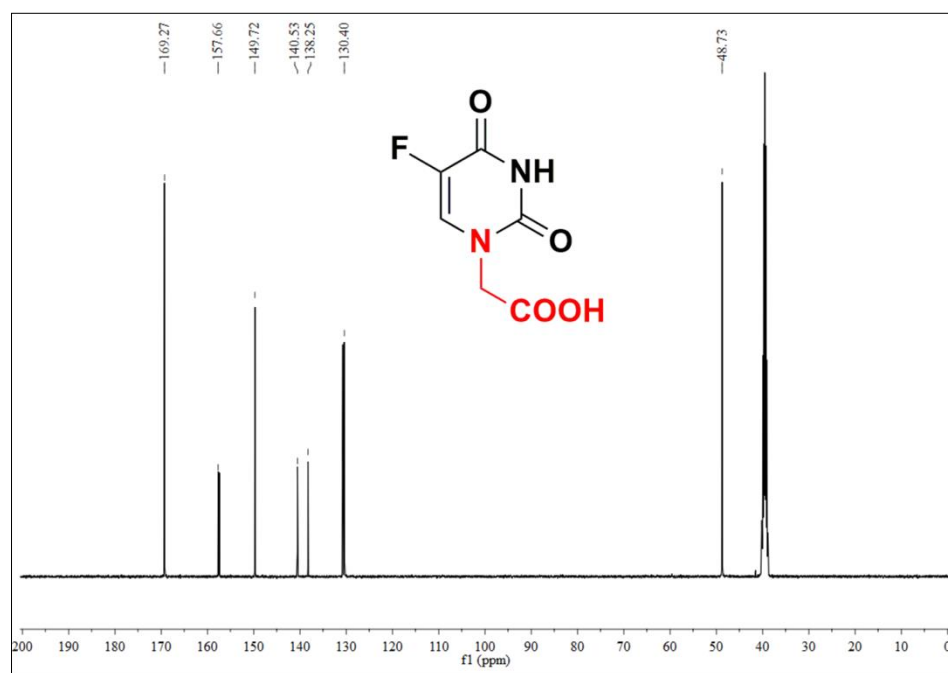

**Figure S3:** <sup>1</sup>H NMR and <sup>13</sup>C NMR spectra of FuA in DMSO-d<sub>6</sub>.

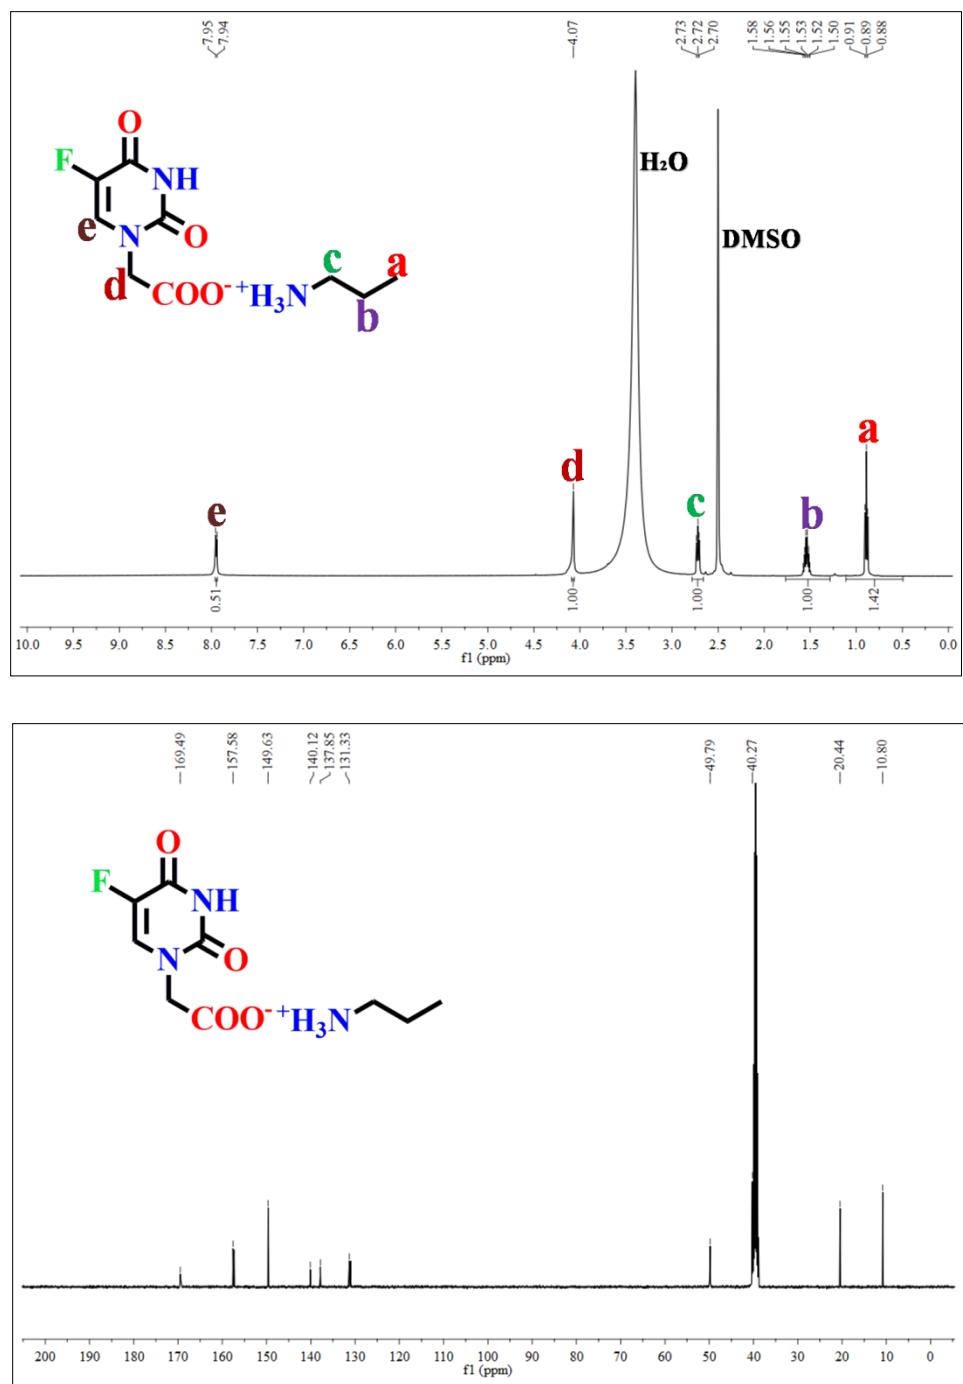

**Figure S4:** <sup>1</sup>H NMR and <sup>13</sup>C NMR spectra of **FuA-3** in DMSO-d<sub>6</sub>.

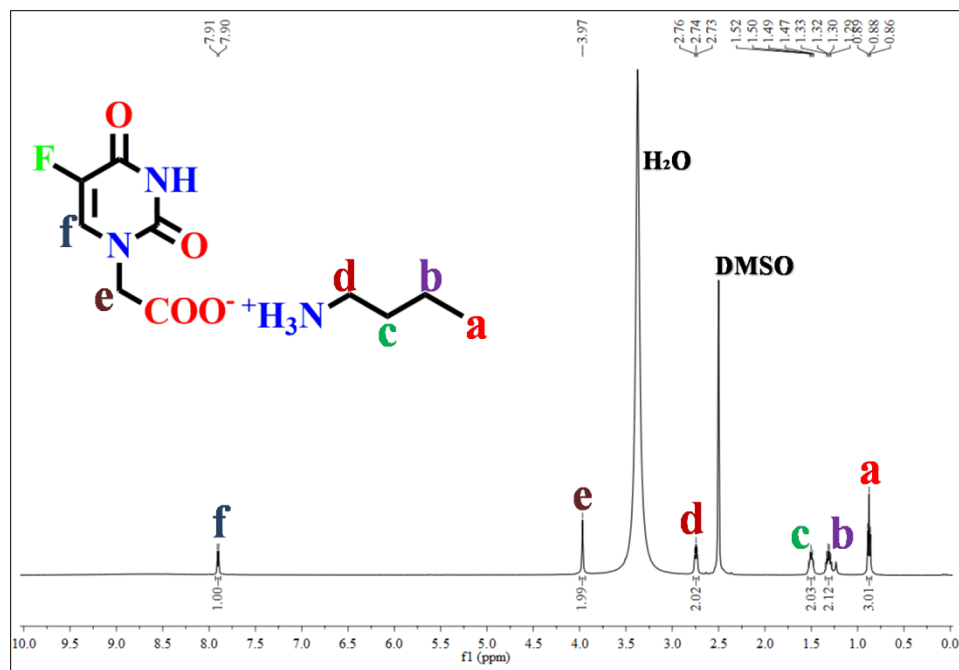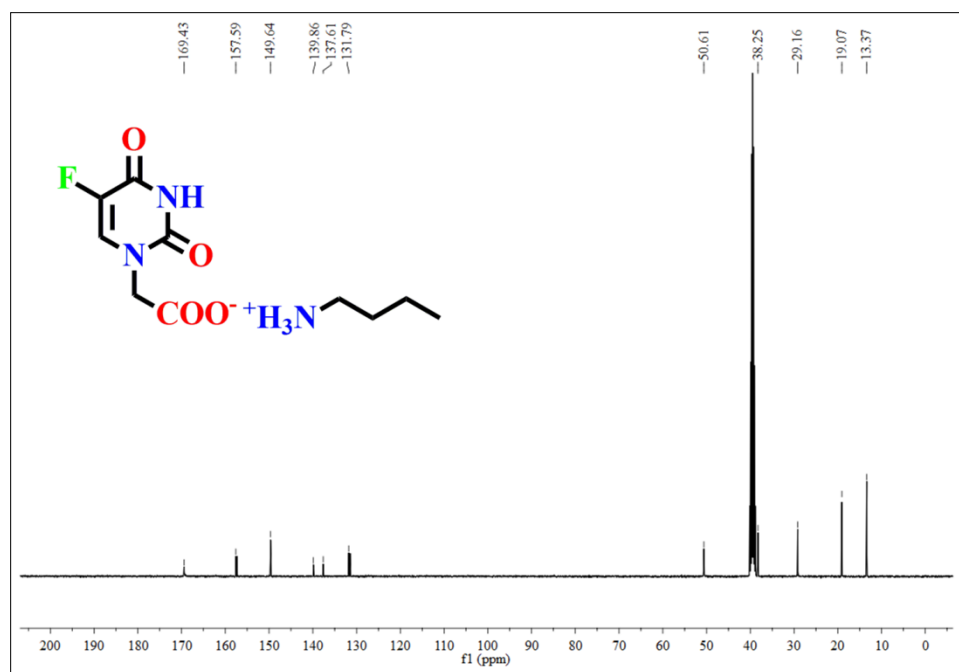

**Figure S5:** <sup>1</sup>H NMR and <sup>13</sup>C NMR spectra of **FuA-4** in DMSO-d<sub>6</sub>.

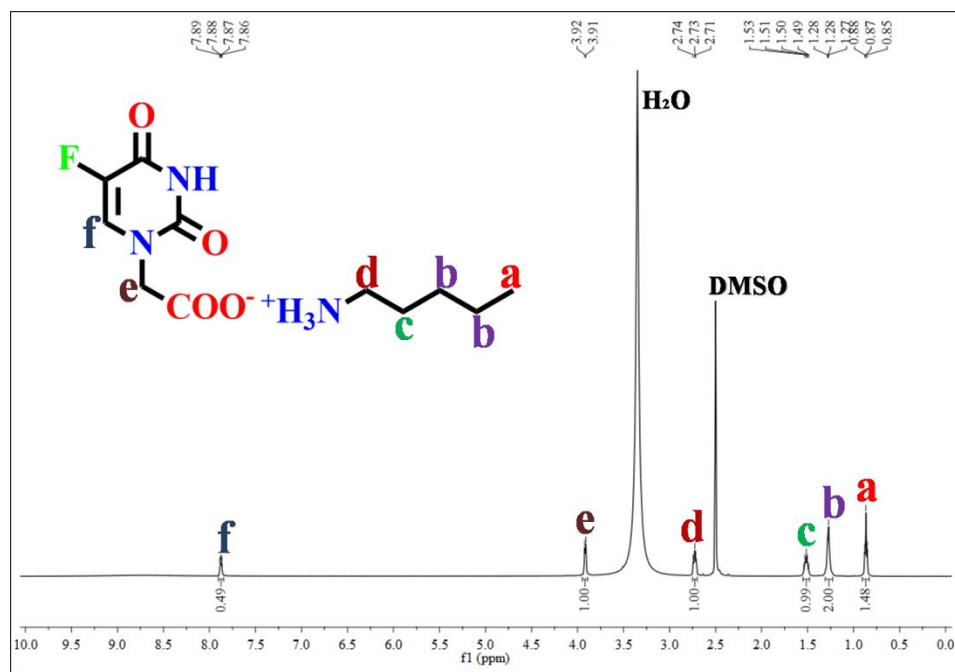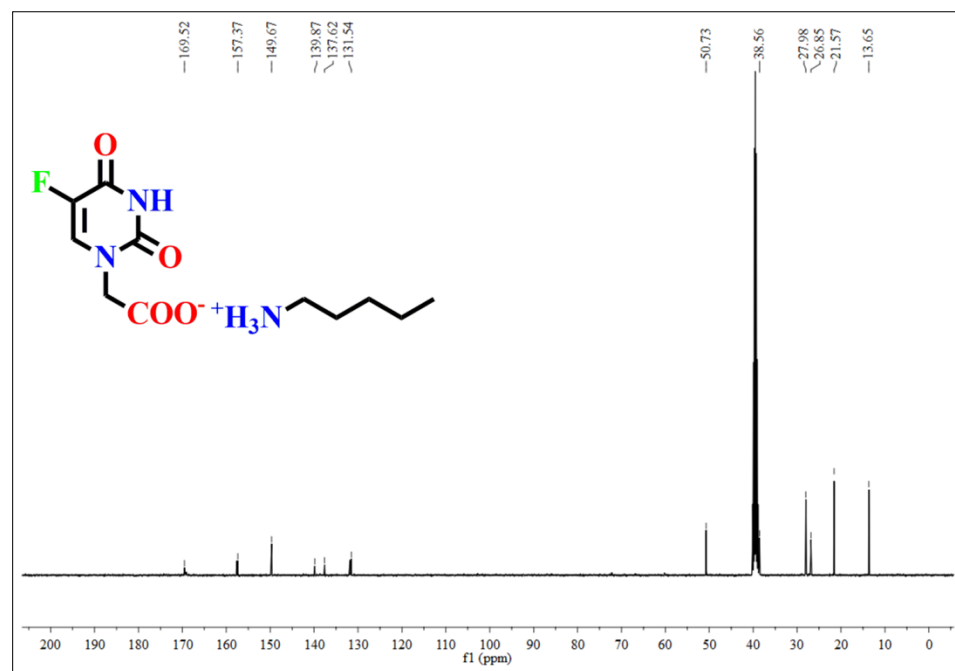

**Figure S6:** <sup>1</sup>H NMR and <sup>13</sup>C NMR spectra of **FuA-5** in DMSO-d<sub>6</sub>.

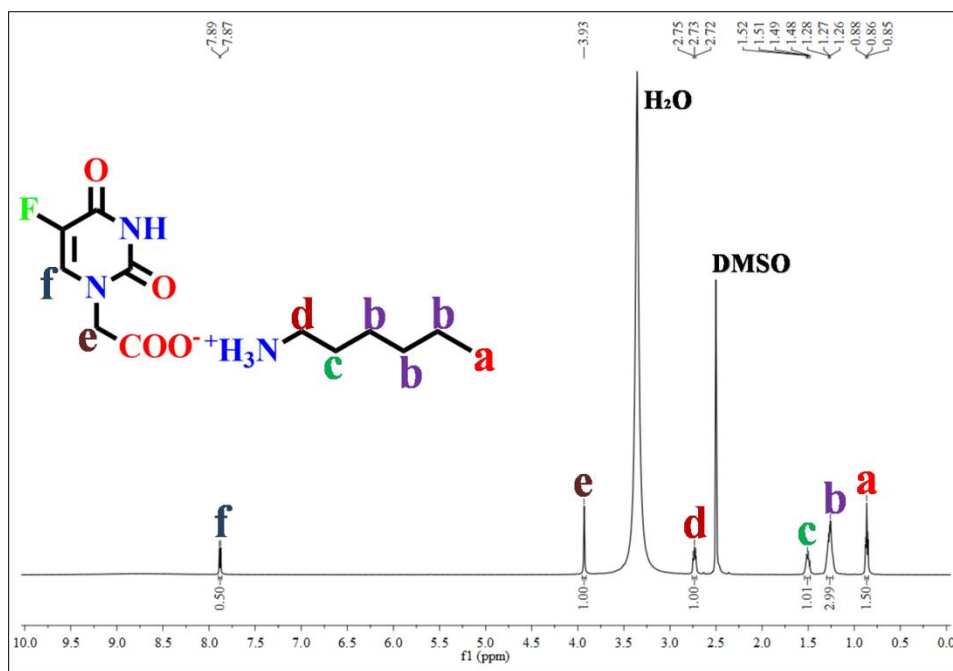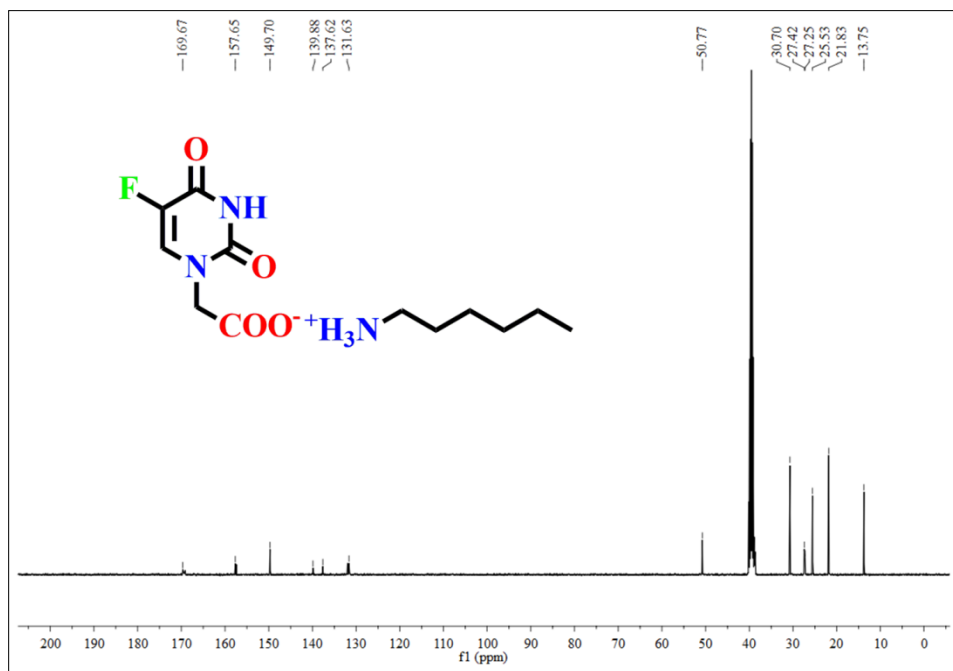

**Figure S7:** <sup>1</sup>H NMR and <sup>13</sup>C NMR spectra of **FuA-6** in DMSO-d<sub>6</sub>.

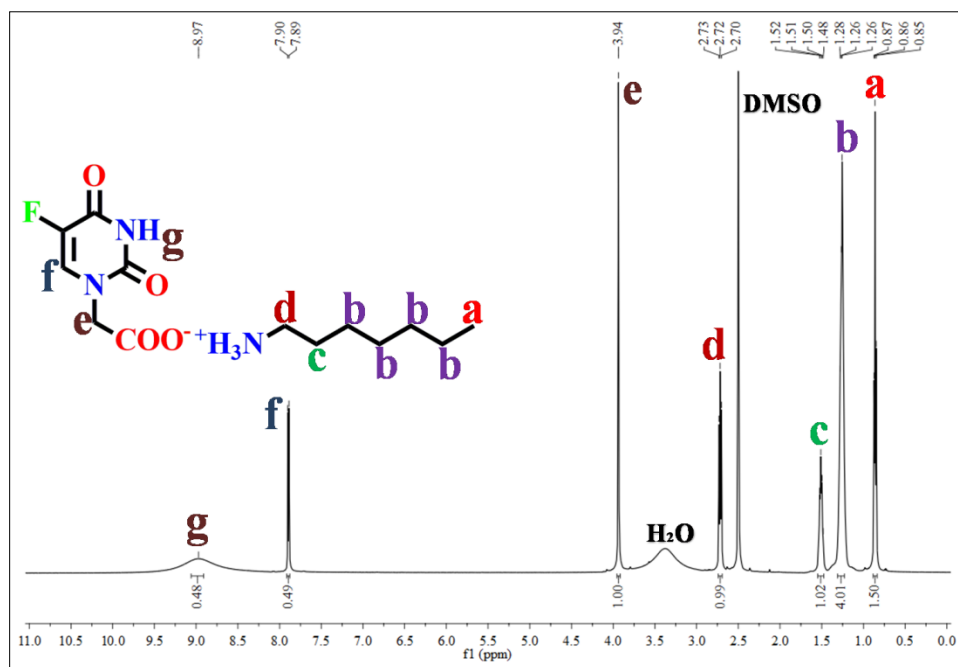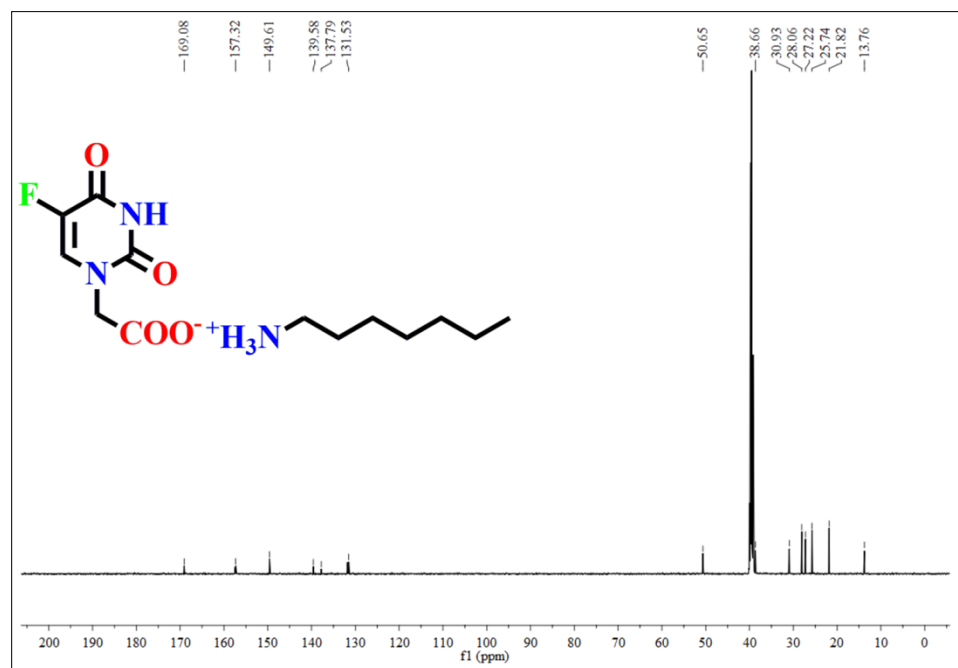

**Figure S8:** <sup>1</sup>H NMR and <sup>13</sup>C NMR spectra of **FuA-7** in DMSO-d<sub>6</sub>.

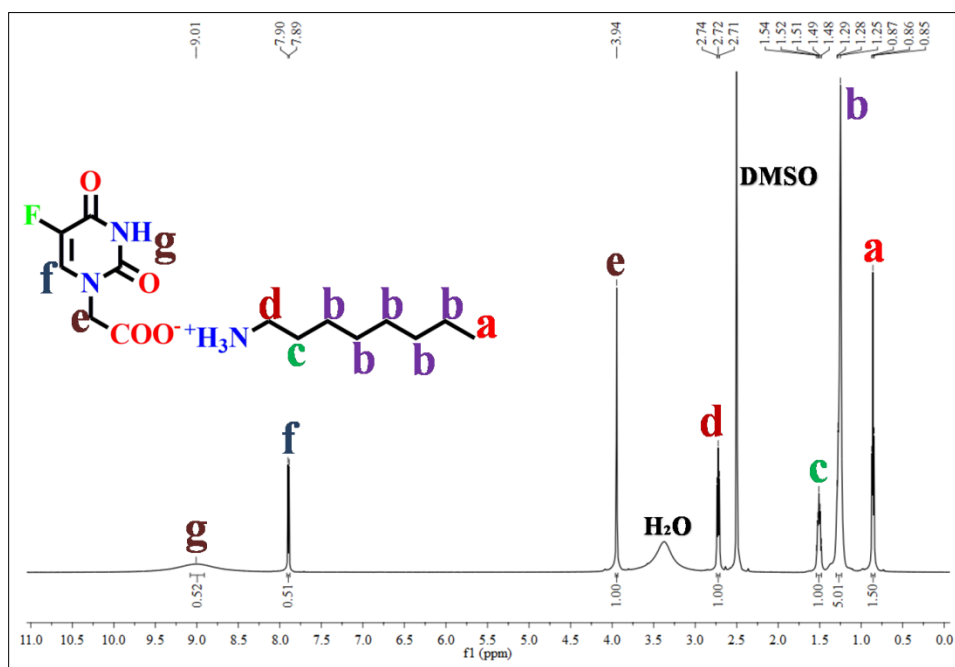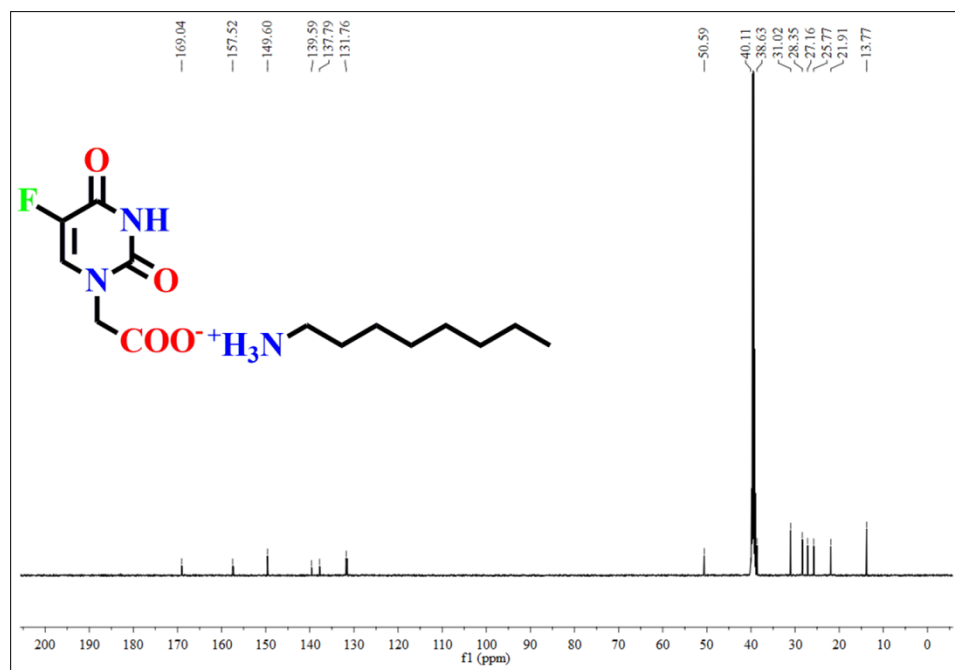

**Figure S9:** <sup>1</sup>H NMR and <sup>13</sup>C NMR spectra of **FuA-8** in DMSO-d<sub>6</sub>.



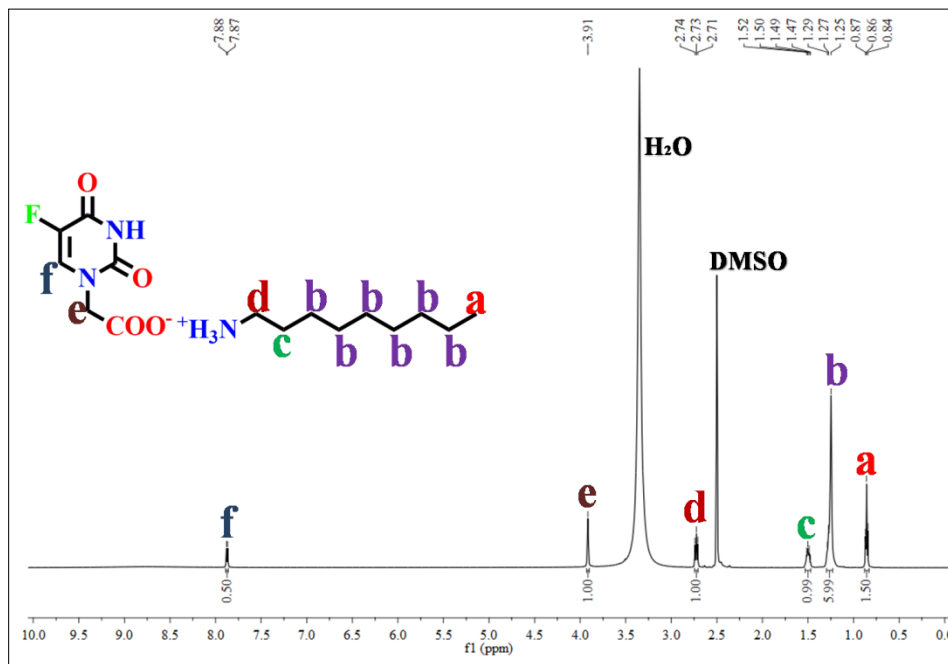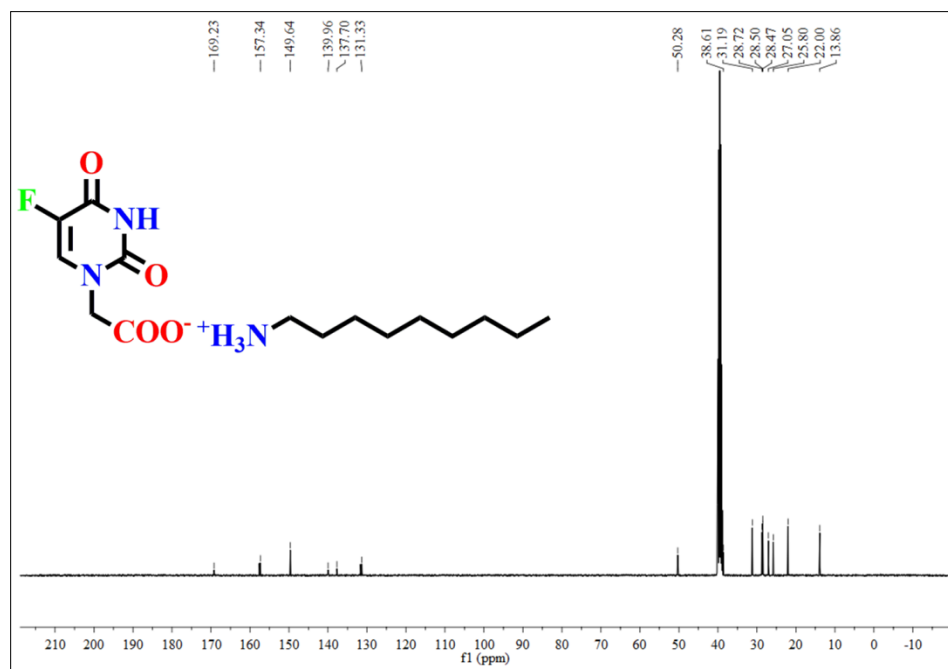

**Figure S10:** <sup>1</sup>H NMR and <sup>13</sup>C NMR spectra of **FuA-9** in DMSO-d<sub>6</sub>.

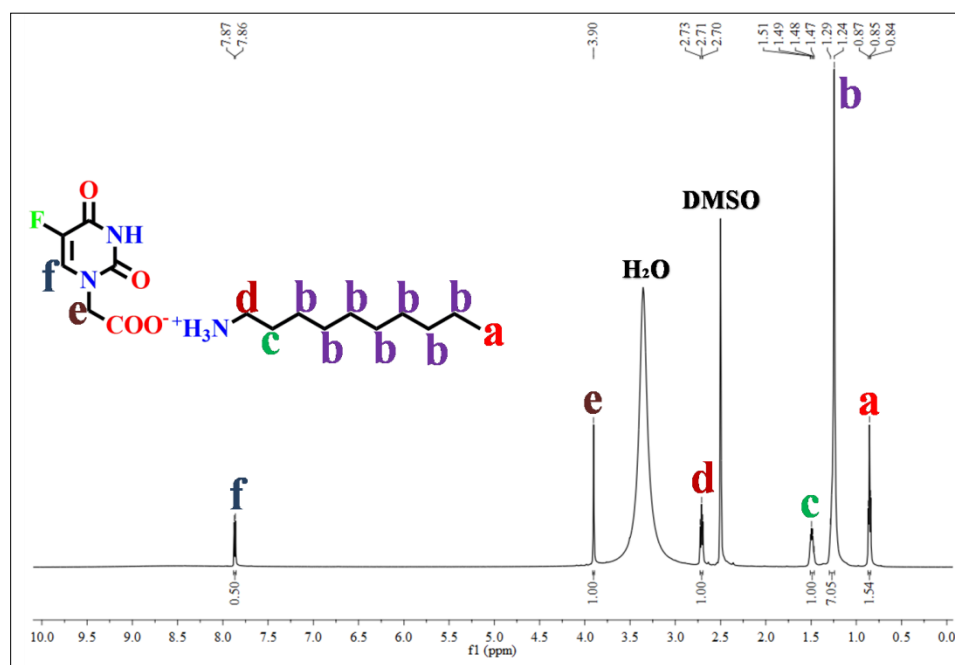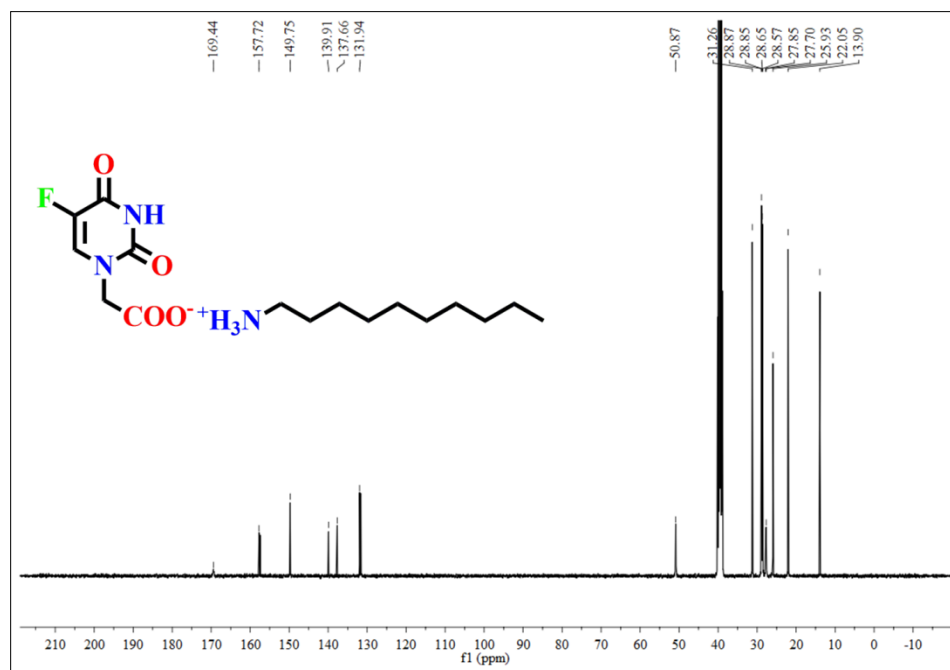

**Figure S11:** <sup>1</sup>H NMR and <sup>13</sup>C NMR spectra of **FuA-10** in DMSO-d<sub>6</sub>.

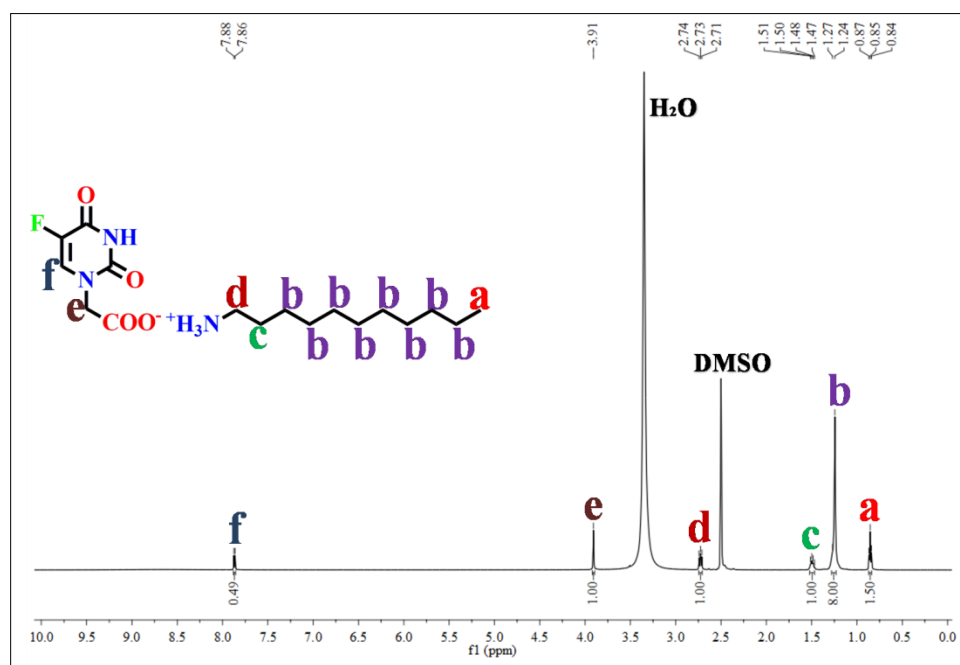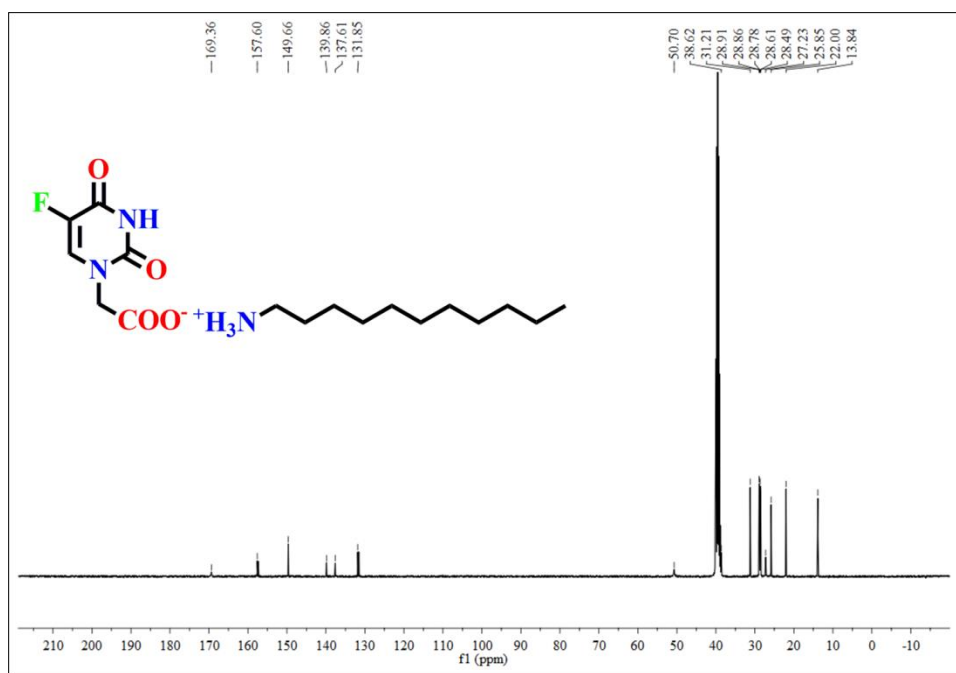

**Figure S12:** <sup>1</sup>H NMR and <sup>13</sup>C NMR spectra of **FuA-11** in DMSO-d<sub>6</sub>.

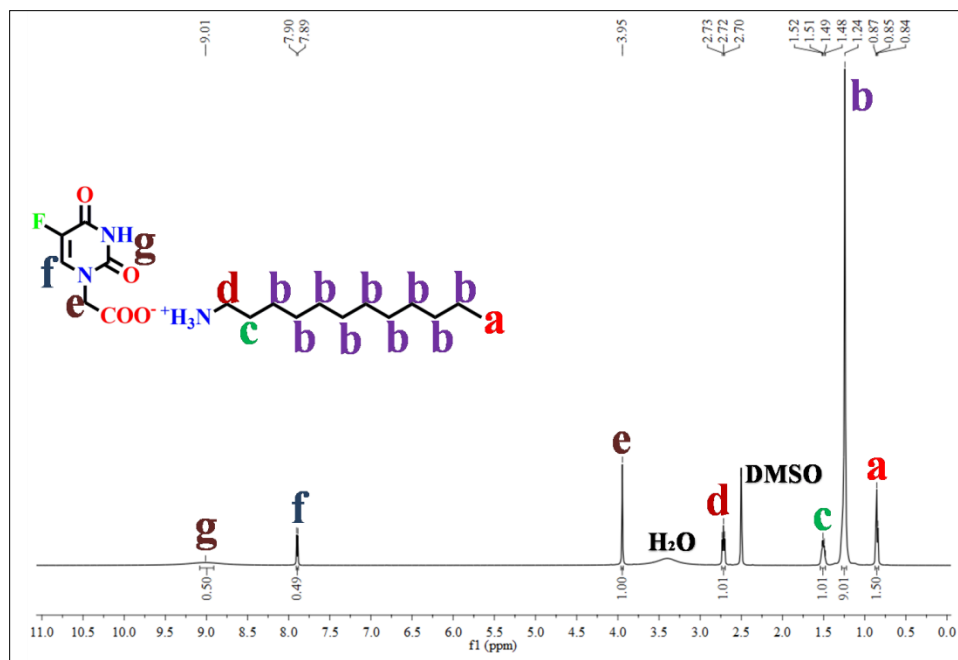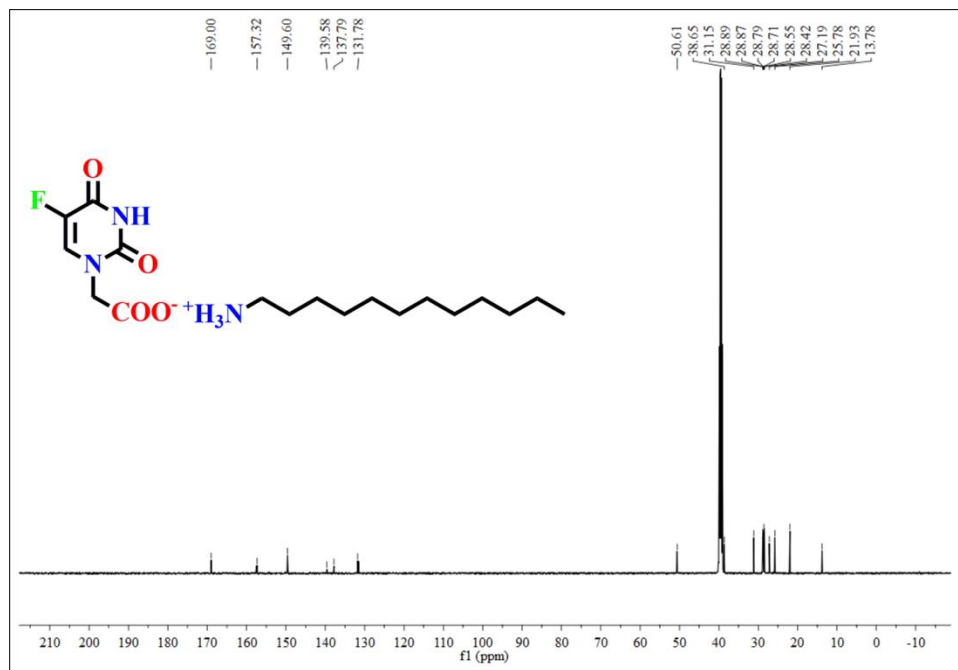

**Figure S13:** <sup>1</sup>H NMR and <sup>13</sup>C NMR spectra of **FuA-12** in DMSO-d<sub>6</sub>.

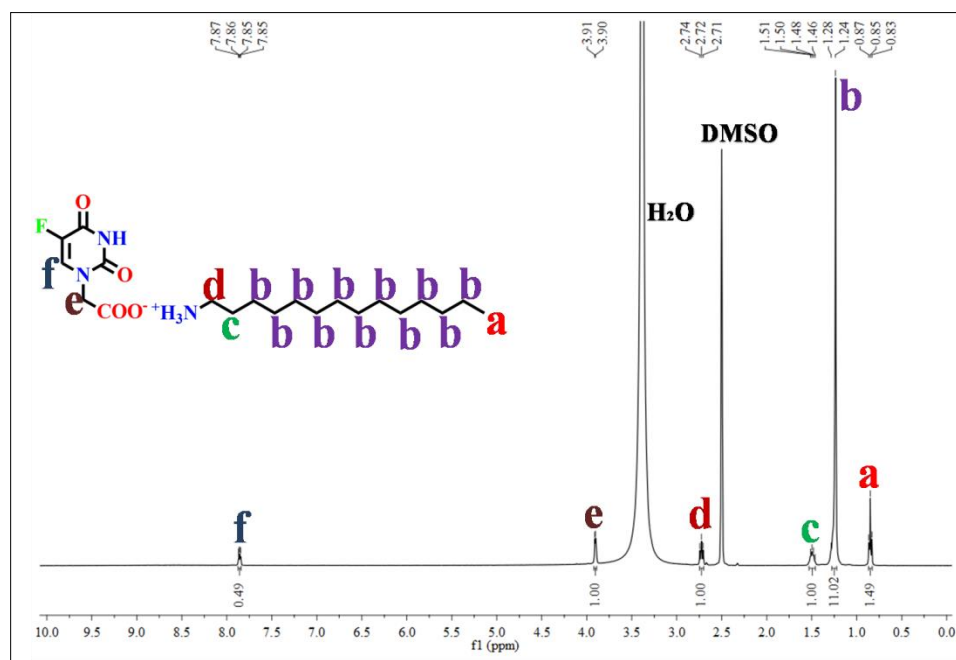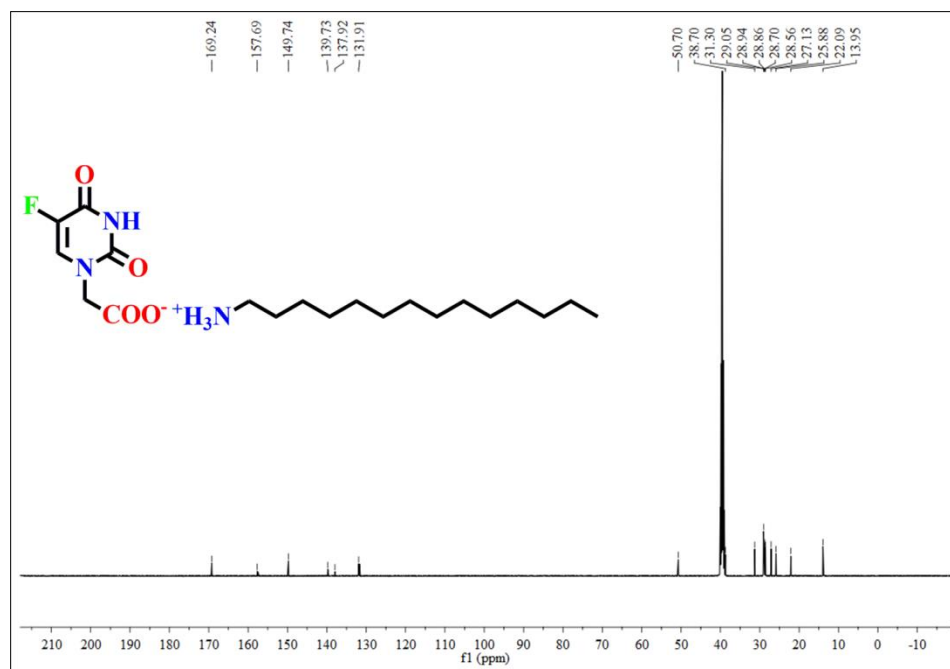

**Figure S14:** <sup>1</sup>H NMR and <sup>13</sup>C NMR spectra of **FuA-14** in DMSO-d<sub>6</sub>.

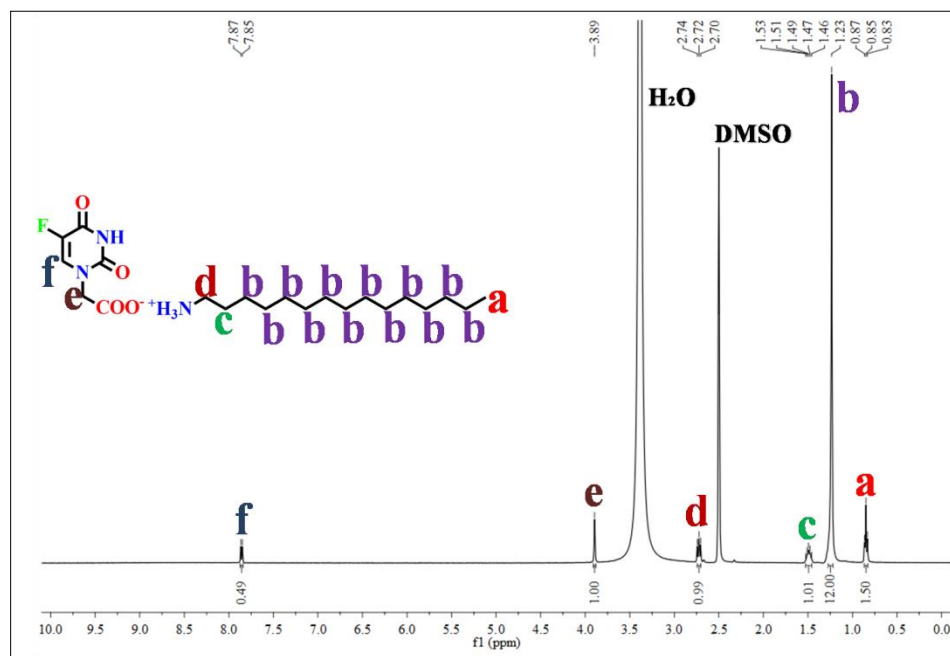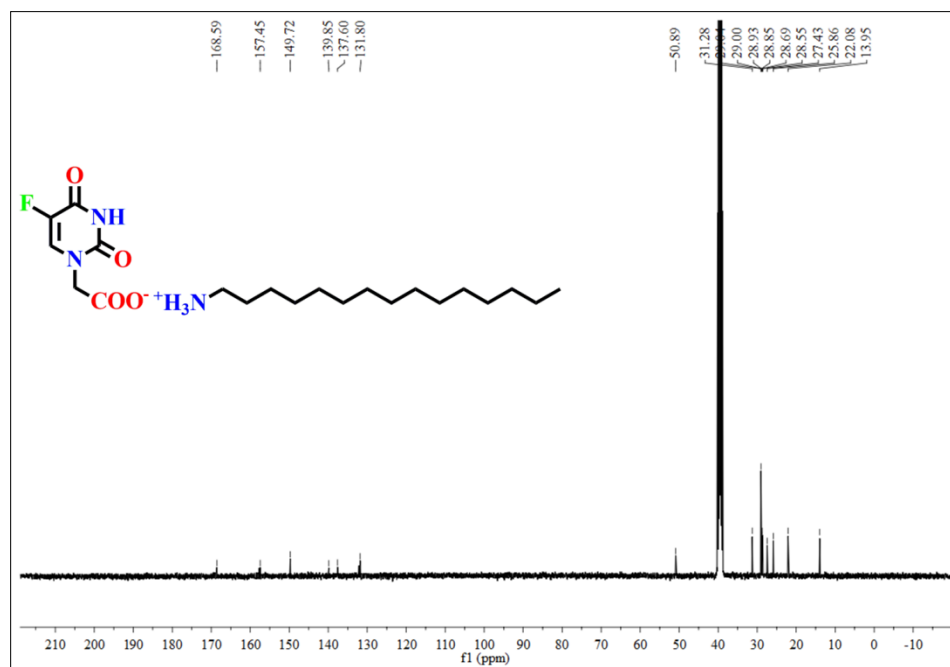

**Figure S15:** <sup>1</sup>H NMR and <sup>13</sup>C NMR spectra of **FuA-15** in DMSO-d<sub>6</sub>.

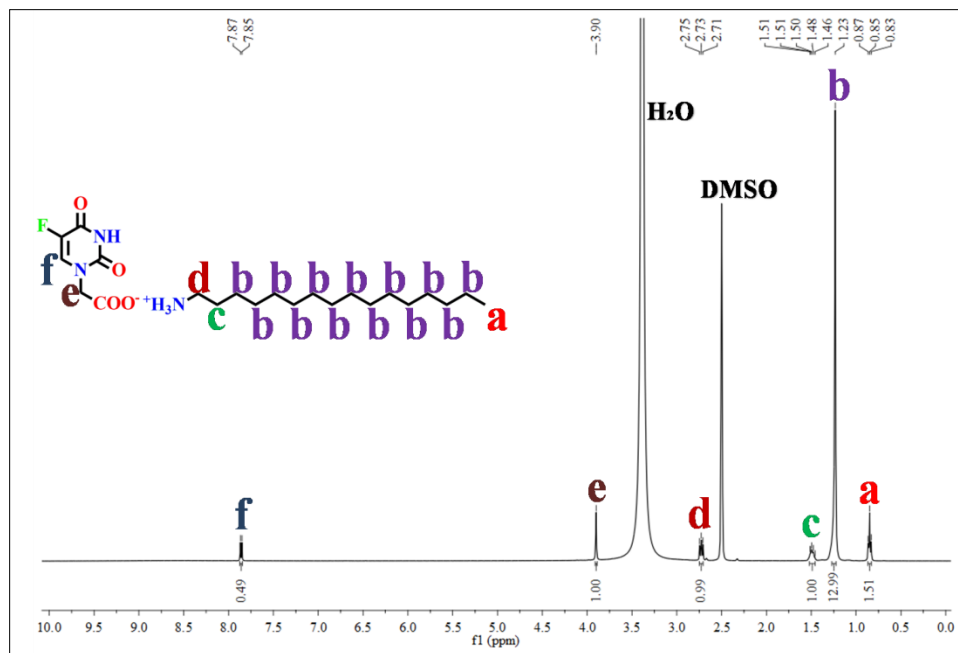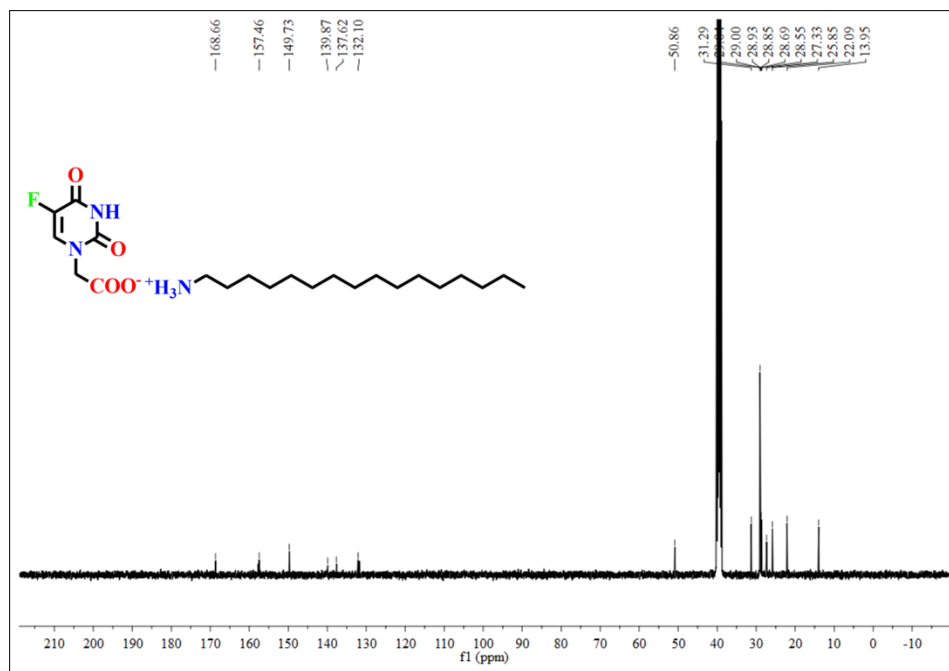

**Figure S16:** <sup>1</sup>H NMR and <sup>13</sup>C NMR spectra of **FuA-16** in DMSO-d<sub>6</sub>.

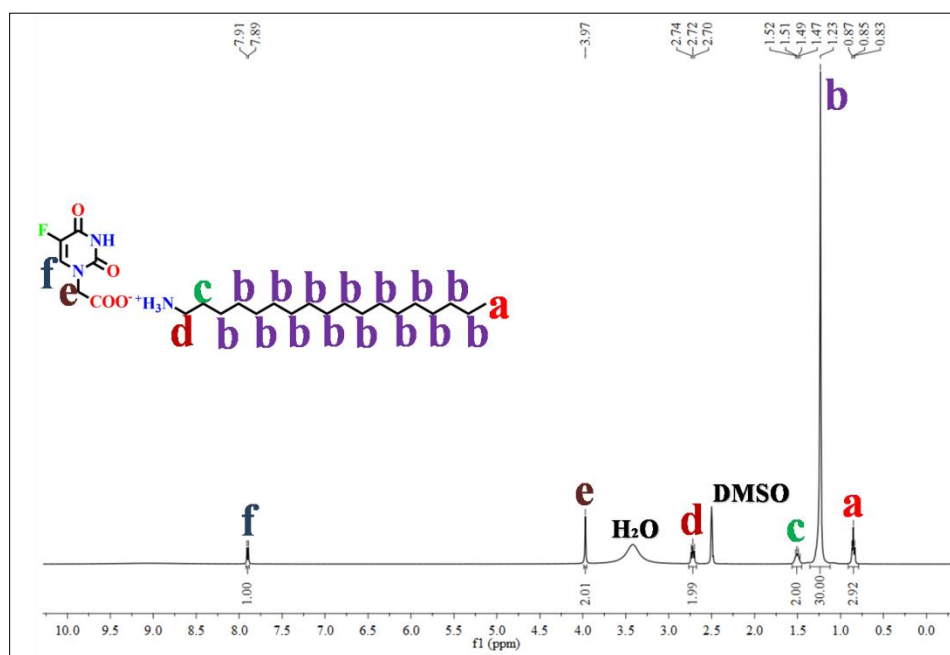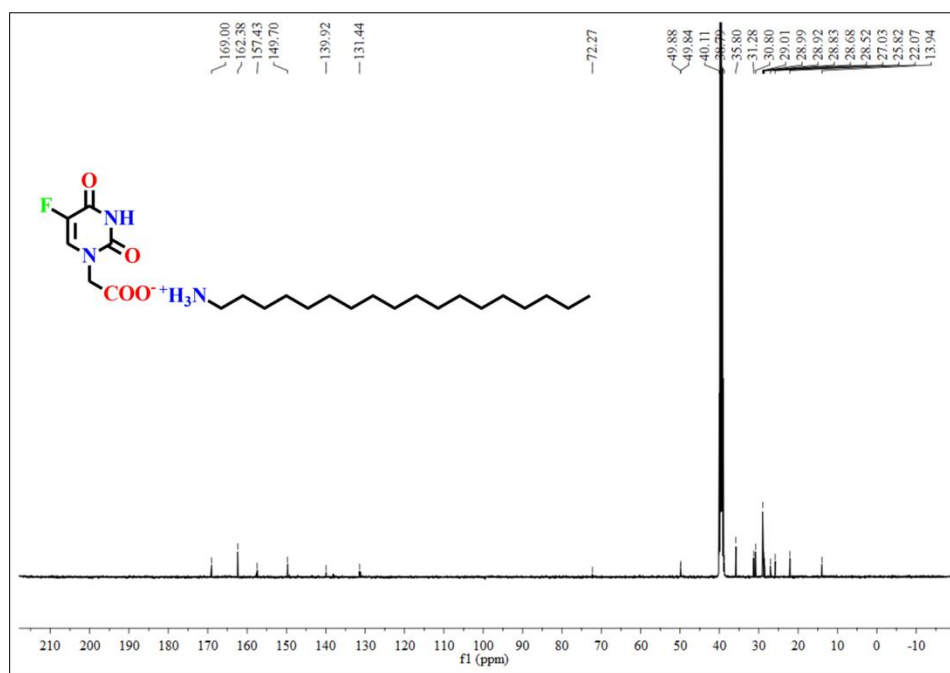

**Figure S17:** <sup>1</sup>H NMR and <sup>13</sup>C NMR spectra of **FuA-18** in DMSO-d<sub>6</sub>.



**Table S1:** Gelation Table including Minimum Gelling Concentration and Gel Dissociation Temperature

| Solvent           | FuA-3 | FuA-4                        | FuA-5 | FuA-6                        | FuA-7                        | FuA-8                        | FuA-9                        | FuA-10                         | FuA-11                         | FuA-12                         | FuA-14                          | FuA-15                          | FuA-16                          | FuA-18                          |
|-------------------|-------|------------------------------|-------|------------------------------|------------------------------|------------------------------|------------------------------|--------------------------------|--------------------------------|--------------------------------|---------------------------------|---------------------------------|---------------------------------|---------------------------------|
| H <sub>2</sub> O  | S     | S                            | S     | S                            | S                            | S                            | S                            | <sup>4</sup> G <sub>58</sub>   | <sup>1.8</sup> G <sub>55</sub> | <sup>4</sup> G <sub>71</sub>   | <sup>1</sup> G <sub>71</sub>    | <sup>1</sup> G <sub>70</sub>    | <sup>1.5</sup> G <sub>60</sub>  | <sup>3.3</sup> G <sub>50</sub>  |
| MS                | S     | INS                          | GP    | INS                          | INS                          | GP                           | GP                           | <sup>2.5</sup> G <sub>85</sub> | <sup>1.8</sup> G <sub>88</sub> | <sup>2.5</sup> G <sub>80</sub> | <sup>1</sup> G <sub>76</sub>    | <sup>1.5</sup> G <sub>74</sub>  | <sup>1.4</sup> G <sub>89</sub>  | <sup>2.2</sup> G <sub>90</sub>  |
| PhNO <sub>2</sub> | S     | INS                          | GP    | <sup>4</sup> G <sub>80</sub> | <sup>4</sup> G <sub>94</sub> | <sup>4</sup> G <sub>88</sub> | <sup>4</sup> G <sub>92</sub> | <sup>2.5</sup> G <sub>81</sub> | <sup>4</sup> G <sub>109</sub>  | <sup>2.5</sup> G <sub>76</sub> | <sup>1.4</sup> G <sub>98</sub>  | <sup>1.5</sup> G <sub>81</sub>  | <sup>2</sup> G <sub>91</sub>    | <sup>2.5</sup> G <sub>96</sub>  |
| PhCl              | INS   | INS                          | INS   | INS                          | INS                          | GP                           | GP                           | GP                             | <sup>4</sup> G <sub>71</sub>   | <sup>1.3</sup> G <sub>93</sub> | <sup>1.2</sup> G <sub>94</sub>  | <sup>1.2</sup> G <sub>91</sub>  | <sup>1.2</sup> G <sub>74</sub>  | <sup>1.5</sup> G <sub>78</sub>  |
| PhBr              | INS   | INS                          | INS   | INS                          | INS                          | GP                           | GP                           | <sup>1.2</sup> G <sub>94</sub> | <sup>4</sup> G <sub>145</sub>  | <sup>1.2</sup> G <sub>86</sub> | <sup>1.2</sup> G <sub>91</sub>  | <sup>1.3</sup> G <sub>103</sub> | <sup>1.2</sup> G <sub>69</sub>  | <sup>2</sup> G <sub>82</sub>    |
| DMSO              | S     | S                            | S     | S                            | S                            | S                            | S                            | S                              | S                              | S                              | S                               | S                               | S                               | S                               |
| DMF               | S     | S                            | S     | S                            | S                            | S                            | S                            | S(C)                           | S                              | S(C)                           | S                               | S                               | S                               | S                               |
| DMA               | S     | S                            | S     | S                            | S                            | S                            | S                            | S                              | S                              | S                              | S                               | S                               | S                               | S                               |
| Toluene           | INS   | INS                          | INS   | INS                          | INS                          | INS                          | INS                          | INS                            | INS                            | INS                            | GP                              | GP                              | GP                              | P                               |
| o-Xylene          | INS   | INS                          | INS   | INS                          | INS                          | INS                          | INS                          | GP                             | INS                            | <sup>G</sup> <sub>149</sub>    | <sup>4</sup> G <sub>138</sub>   | <sup>4</sup> G <sub>140</sub>   | <sup>4</sup> G <sub>142</sub>   | <sup>4</sup> G <sub>145</sub>   |
| m-Xylene          | INS   | INS                          | INS   | INS                          | INS                          | INS                          | INS                          | P                              | INS                            | GP                             | <sup>4</sup> G <sub>120</sub>   | <sup>4</sup> G <sub>130</sub>   | <sup>4</sup> G <sub>134</sub>   | <sup>2.9</sup> G <sub>121</sub> |
| p-Xylene          | INS   | INS                          | INS   | INS                          | INS                          | INS                          | INS                          | INS                            | INS                            | GP                             | <sup>4</sup> G <sub>108</sub>   | <sup>4</sup> G <sub>120</sub>   | <sup>4</sup> G <sub>120</sub>   | <sup>2.2</sup> G <sub>110</sub> |
| Mesitylene        | INS   | INS                          | INS   | INS                          | INS                          | INS                          | INS                          | INS                            | INS                            | INS                            | <sup>1.2</sup> G <sub>103</sub> | <sup>1.2</sup> G <sub>100</sub> | <sup>1.2</sup> G <sub>101</sub> | <sup>2.9</sup> G <sub>105</sub> |
| Dioxane           | GP    | <sup>4</sup> G <sub>76</sub> | GP    | <sup>4</sup> G <sub>86</sub> | INS                          | <sup>4</sup> G <sub>70</sub> | INS                          | GP                             | <sup>4</sup> G <sub>62</sub>   | <sup>4</sup> G <sub>90</sub>   | <sup>1.3</sup> G <sub>95</sub>  | <sup>1.5</sup> G <sub>79</sub>  | <sup>1.4</sup> G <sub>80</sub>  | <sup>3.3</sup> G <sub>88</sub>  |
| EG                | S     | S                            | S     | S                            | S                            | S                            | S                            | S                              | S                              | S                              | S                               | S                               | S                               | S                               |

<sup>MGC</sup>G<sub>Tgel</sub> - Minimum Gelling Concentration, <sup>G</sup>G<sub>Tgel</sub> - Gel dissociation temperature, S – Soluble, INS – Insoluble, GP – Gelatinous precipitate, C - Crystal

**Table S2:** Crystallography Information Table

| Identification Code                             | FuA_9                                                           | FuA_10                                                          | FuA_11                                                         | FuA_12                                                         | FuA_14                                                         | FuA_15                                                         |
|-------------------------------------------------|-----------------------------------------------------------------|-----------------------------------------------------------------|----------------------------------------------------------------|----------------------------------------------------------------|----------------------------------------------------------------|----------------------------------------------------------------|
| Crystallizing solvent                           | MeOH+DCM+Water+EtOAc                                            | DMF                                                             | MeOH+DCM+EtOAc                                                 | DMF                                                            | MeOH+DMF                                                       | MeOH+DMF                                                       |
| CCDC No.                                        | 1868726                                                         | 1868727                                                         | 1868722                                                        | 1868723                                                        | 1868725                                                        | 1868724                                                        |
| Empirical Formula                               | C <sub>20</sub> H <sub>30</sub> N <sub>4</sub> O <sub>5</sub> F | C <sub>20</sub> H <sub>26</sub> N <sub>3</sub> O <sub>4</sub> F | C <sub>20</sub> H <sub>28</sub> FN <sub>3</sub> O <sub>3</sub> | C <sub>20</sub> H <sub>30</sub> FN <sub>4</sub> O <sub>4</sub> | C <sub>30</sub> H <sub>40</sub> FN <sub>3</sub> O <sub>4</sub> | C <sub>30</sub> H <sub>36</sub> FN <sub>2</sub> O <sub>4</sub> |
| Formula Weight                                  | 425.48                                                          | 391.44                                                          | 377.45                                                         | 409.48                                                         | 525.65                                                         | 507.61                                                         |
| Temperature/K                                   | 296.15                                                          | 296.15                                                          | 100.09                                                         | 99.98                                                          | 115.14                                                         | 105.94                                                         |
| Crystal System                                  | triclinic                                                       | triclinic                                                       | triclinic                                                      | triclinic                                                      | triclinic                                                      | triclinic                                                      |
| Crystal Size/mm <sup>3</sup>                    | 0.24 × 0.2 × 0.12                                               | 0.32 × 0.24 × 0.18                                              | 0.23 × 0.18 × 0.12                                             | 0.3 × 0.28 × 0.26                                              | 0.24 × 0.12 × 0.08                                             | 0.2 × 0.1 × 0.07                                               |
| Space Group                                     | P-1                                                             | P-1                                                             | P-1                                                            | P-1                                                            | P1                                                             | P-1                                                            |
| a/Å                                             | 4.6735(7)                                                       | 8.8655(11)                                                      | 4.6593(2)                                                      | 8.8667(6)                                                      | 4.7844(2)                                                      | 4.7775(4)                                                      |
| b/Å                                             | 10.5865(15)                                                     | 9.0075(11)                                                      | 10.5631(3)                                                     | 9.0125(6)                                                      | 10.4899(3)                                                     | 10.4402(9)                                                     |
| c/Å                                             | 17.880(3)                                                       | 18.138(2)                                                       | 19.8391(7)                                                     | 20.1479(11)                                                    | 21.3123(7)                                                     | 45.660(3)                                                      |
| α/°                                             | 100.883(2)                                                      | 87.057(2)                                                       | 97.467(2)                                                      | 89.377(2)                                                      | 82.522(2)                                                      | 88.427(3)                                                      |
| β/°                                             | 96.135(2)                                                       | 76.644(2)                                                       | 92.052(3)                                                      | 80.718(2)                                                      | 87.079(2)                                                      | 88.793(2)                                                      |
| γ/°                                             | 91.952(2)                                                       | 88.318(2)                                                       | 91.741(2)                                                      | 88.288(2)                                                      | 88.450(2)                                                      | 88.556(3)                                                      |
| Volume/ Å <sup>3</sup>                          | 862.4(2)                                                        | 1407.1(3)                                                       | 966.91(6)                                                      | 1588.22(17)                                                    | 1058.92(6)                                                     | 2275.4(3)                                                      |
| Density (ρ <sub>calc</sub> /g/cm <sup>3</sup> ) | 1.638                                                           | 1.848                                                           | 1.296                                                          | 1.712                                                          | 1.649                                                          | 1.482                                                          |
| μ/mm <sup>-1</sup>                              | 0.125                                                           | 0.138                                                           | 0.775                                                          | 0.128                                                          | 0.936                                                          | 0.103                                                          |
| Z                                               | 2                                                               | 4                                                               | 2                                                              | 4                                                              | 2                                                              | 4                                                              |
| F(000)                                          | 454.0                                                           | 832.0                                                           | 404.0                                                          | 876.0                                                          | 564.0                                                          | 1084.0                                                         |
| Radiation                                       | MoKα (λ = 0.71073)                                              | MoKα (λ = 0.71073)                                              | CuKα (λ = 1.54178)                                             | MoKα (λ = 0.71073)                                             | CuKα (λ = 1.54178)                                             | MoKα (λ = 0.71073)                                             |
| 2θ range for data collection/°                  | 3.924 to 52.228                                                 | 4.528 to 49.692                                                 | 8.448 to 137.098                                               | 4.522 to 60.056                                                | 8.378 to 118.102                                               | 4.462 to 49.086                                                |
| Index ranges                                    | -5 ≤ h ≤ 5, -13 ≤ k ≤ 13, -22 ≤ l ≤ 21                          | -10 ≤ h ≤ 10, -10 ≤ k ≤ 10, -21 ≤ l ≤ 21                        | -5 ≤ h ≤ 5, -12 ≤ k ≤ 12, -23 ≤ l ≤ 23                         | -12 ≤ h ≤ 12, -12 ≤ k ≤ 11, -28 ≤ l ≤ 27                       | -5 ≤ h ≤ 5, -11 ≤ k ≤ 10, -22 ≤ l ≤ 23                         | -5 ≤ h ≤ 5, -12 ≤ k ≤ 12, -53 ≤ l ≤ 52                         |
| Reflections collected                           | 22159                                                           | 33446                                                           | 6661                                                           | 20939                                                          | 6122                                                           | 19877                                                          |
| Independent reflections                         | 3370 [R <sub>int</sub> = 0.0822, R <sub>sigma</sub> = 0.0593]   | 4881 [R <sub>int</sub> = 0.0464, R <sub>sigma</sub> = 0.0312]   | 3367 [R <sub>int</sub> = 0.0593, R <sub>sigma</sub> = 0.0855]  | 9083 [R <sub>int</sub> = 0.0563, R <sub>sigma</sub> = 0.0745]  | 4231 [R <sub>int</sub> = 0.0385, R <sub>sigma</sub> = 0.0641]  | 7568 [R <sub>int</sub> = 0.0563, R <sub>sigma</sub> = 0.0818]  |
| Data/restraints/parameters                      | 3370/0/215                                                      | 4881/0/321                                                      | 3367/0/229                                                     | 9083/0/357                                                     | 4231/3/510                                                     | 7568/0/238                                                     |
| Goodness of fit on F <sup>2</sup>               | 1.023                                                           | 1.054                                                           | 1.036                                                          | 1.041                                                          | 1.035                                                          | 1.091                                                          |
| Final R indexes [I >= 2σ(I)]                    | R <sub>1</sub> = 0.0498, wR <sub>2</sub> = 0.0951               | R <sub>1</sub> = 0.0376, wR <sub>2</sub> = 0.0795               | R <sub>1</sub> = 0.0525, wR <sub>2</sub> = 0.1276              | R <sub>1</sub> = 0.0573, wR <sub>2</sub> = 0.1429              | R <sub>1</sub> = 0.0468, wR <sub>2</sub> = 0.1125              | R <sub>1</sub> = 0.0910, wR <sub>2</sub> = 0.1886              |
| Final R indexes [all data]                      | R <sub>1</sub> = 0.1002, wR <sub>2</sub> = 0.1179               | R <sub>1</sub> = 0.0636, wR <sub>2</sub> = 0.0925               | R <sub>1</sub> = 0.0828, wR <sub>2</sub> = 0.1482              | R <sub>1</sub> = 0.0980, wR <sub>2</sub> = 0.1765              | R <sub>1</sub> = 0.0601, wR <sub>2</sub> = 0.1260              | R <sub>1</sub> = 0.1512, wR <sub>2</sub> = 0.2123              |
| Largest diff. peak/hole/e Å <sup>-3</sup>       | 0.28/-0.26                                                      | 0.21/-0.22                                                      | 0.23/-0.28                                                     | 0.39/-0.35                                                     | 0.26/-0.23                                                     | 0.63/-0.48                                                     |
| Flack parameter                                 | -                                                               | -                                                               | -                                                              | -                                                              | 0.4(3)                                                         | -                                                              |

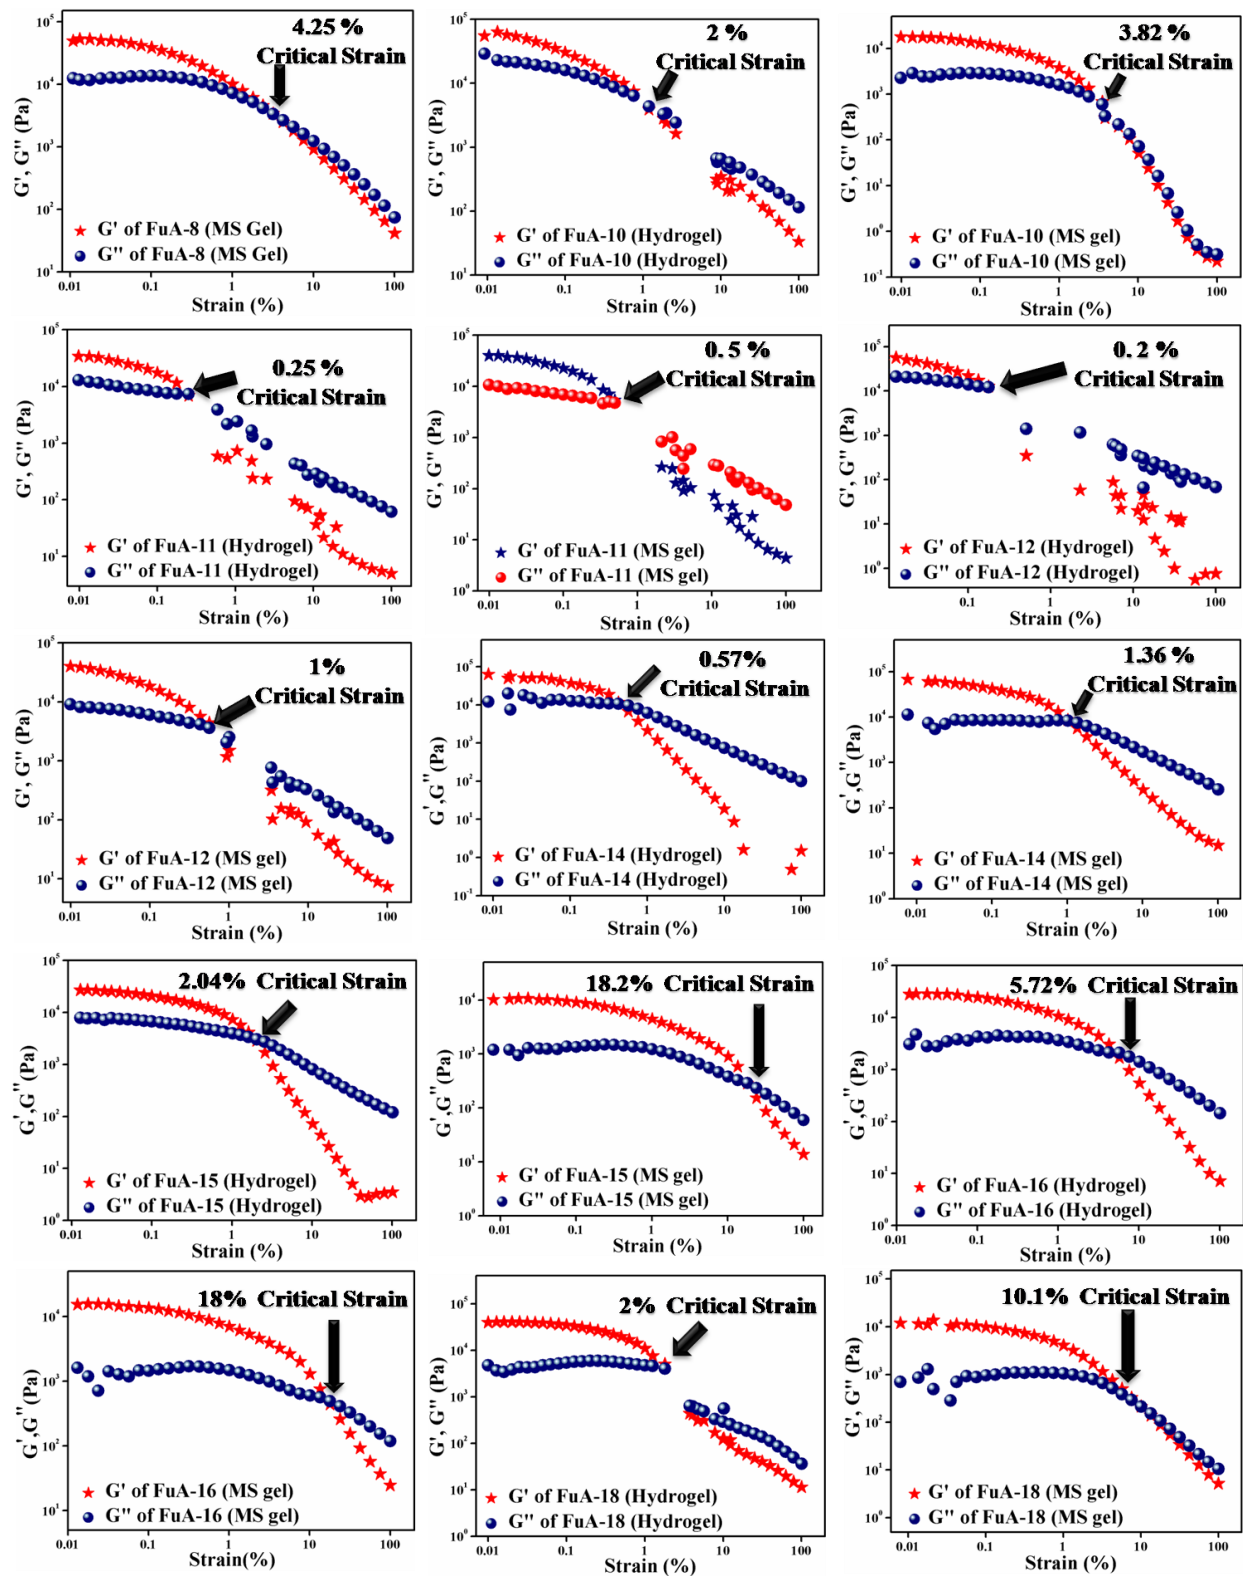

**Figure S18:** Amplitude Sweep Rheology Experiment of Some Selected Hydro and MS Gels.

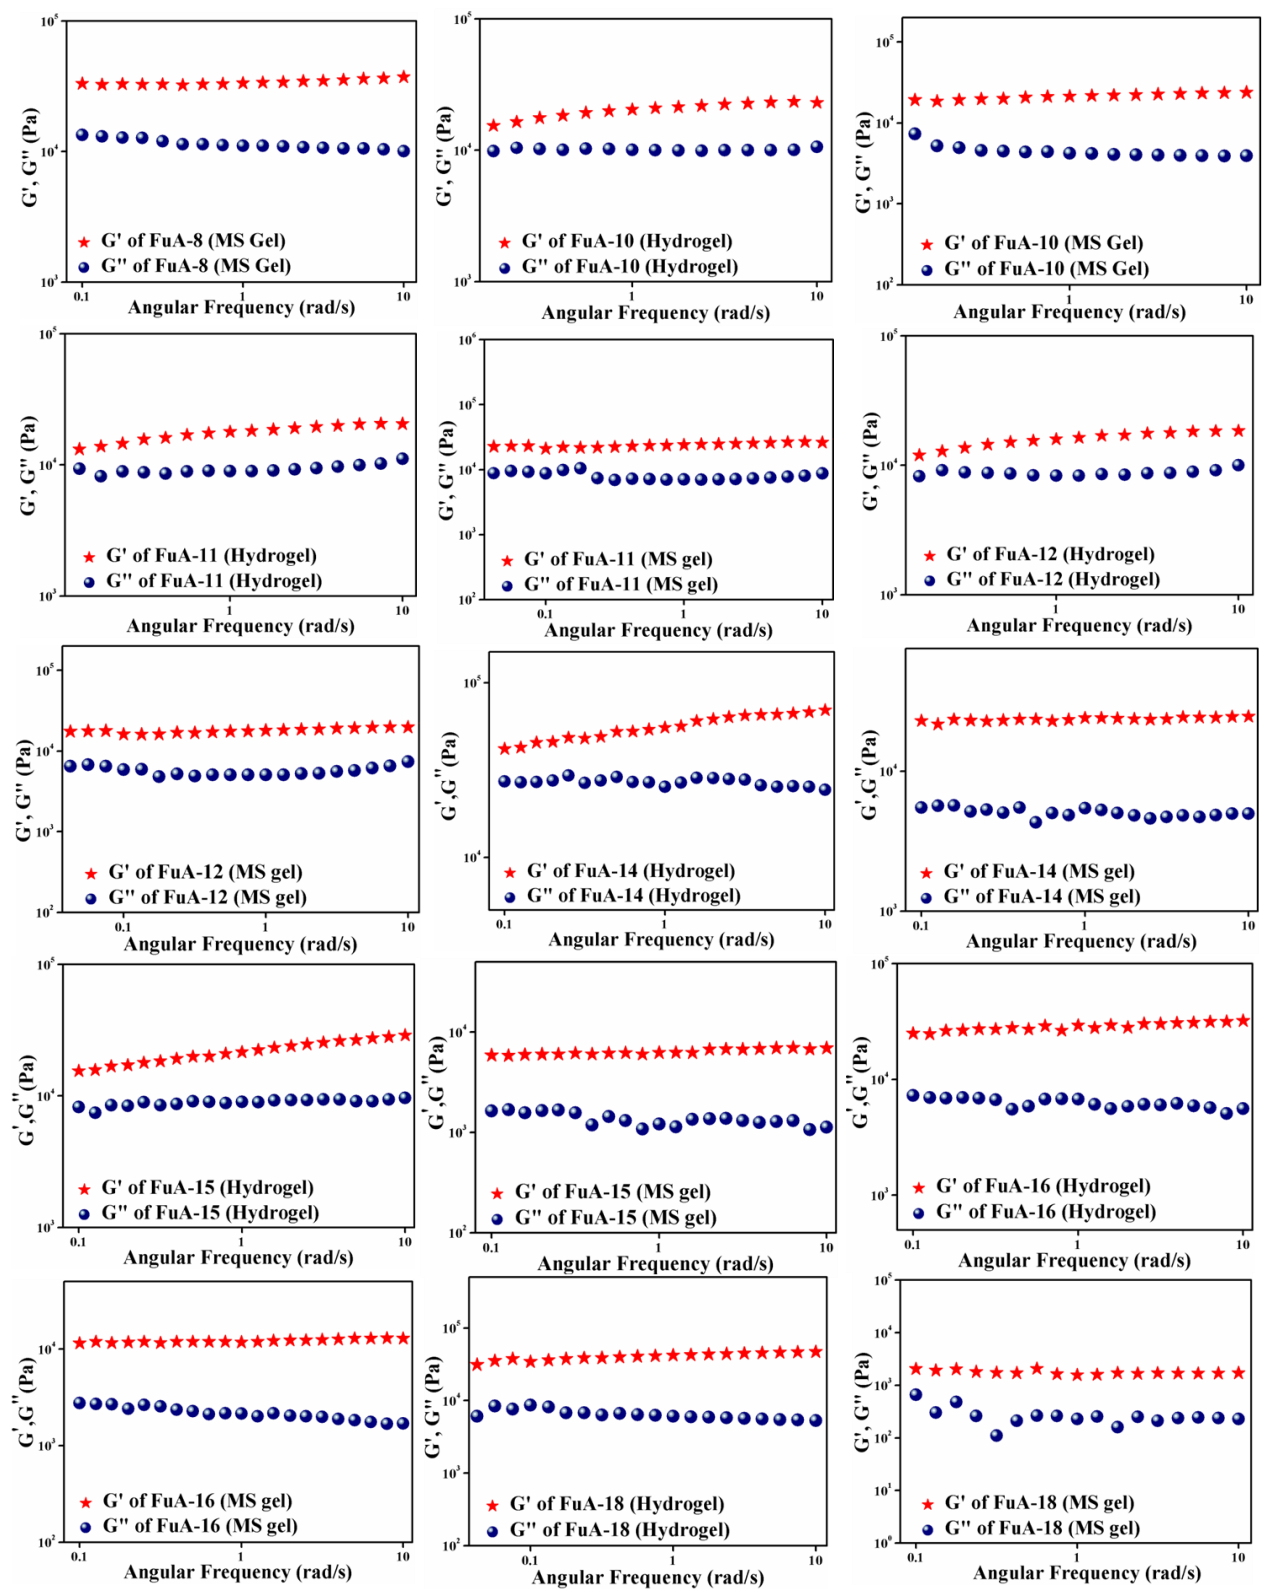

**Figure S19:** Frequency Sweep Rheology Experiment of Some Selected Hydro and MS Gels.

**Table S3:** Average  $G'$ ,  $G''$  and  $\tan \delta$  values of the gels obtained from rheology

|                    | Average $G'$ (kPa) | Average $G''$ (kPa) | $G''/G'$ ( $\tan \delta$ ) |
|--------------------|--------------------|---------------------|----------------------------|
| <b>FuA-10 (MS)</b> | <b>21.157</b>      | <b>4.890</b>        | <b>0.231165</b>            |
| <b>FuA-10 (HG)</b> | <b>19.791</b>      | <b>10.264</b>       | <b>0.518641</b>            |
| <b>FuA-11 (MS)</b> | <b>23.336</b>      | <b>9.113</b>        | <b>0.390536</b>            |
| <b>FuA-11 (HG)</b> | <b>17.277</b>      | <b>9.384</b>        | <b>0.543162</b>            |
| <b>FuA-12 (MS)</b> | <b>18.465</b>      | <b>6.820</b>        | <b>0.369382</b>            |
| <b>FuA-12 (HG)</b> | <b>15.544</b>      | <b>8.837</b>        | <b>0.568564</b>            |
| <b>FuA-14 (MS)</b> | <b>23.538</b>      | <b>5.058</b>        | <b>0.21491</b>             |
| <b>FuA-14 (HG)</b> | <b>56.176</b>      | <b>27.004</b>       | <b>0.480715</b>            |
| <b>FuA-15 (MS)</b> | <b>6.371</b>       | <b>1.362</b>        | <b>0.213885</b>            |
| <b>FuA-15 (HG)</b> | <b>21.952</b>      | <b>8.941</b>        | <b>0.40731</b>             |
| <b>FuA-16 (MS)</b> | <b>12.166</b>      | <b>2.186</b>        | <b>0.179687</b>            |
| <b>FuA-16 (HG)</b> | <b>28.580</b>      | <b>6.262</b>        | <b>0.21911</b>             |
| <b>FuA-18 (MS)</b> | <b>1.763</b>       | <b>0.271</b>        | <b>0.153769</b>            |
| <b>FuA-18 (HG)</b> | <b>38.745</b>      | <b>7.436</b>        | <b>0.191939</b>            |

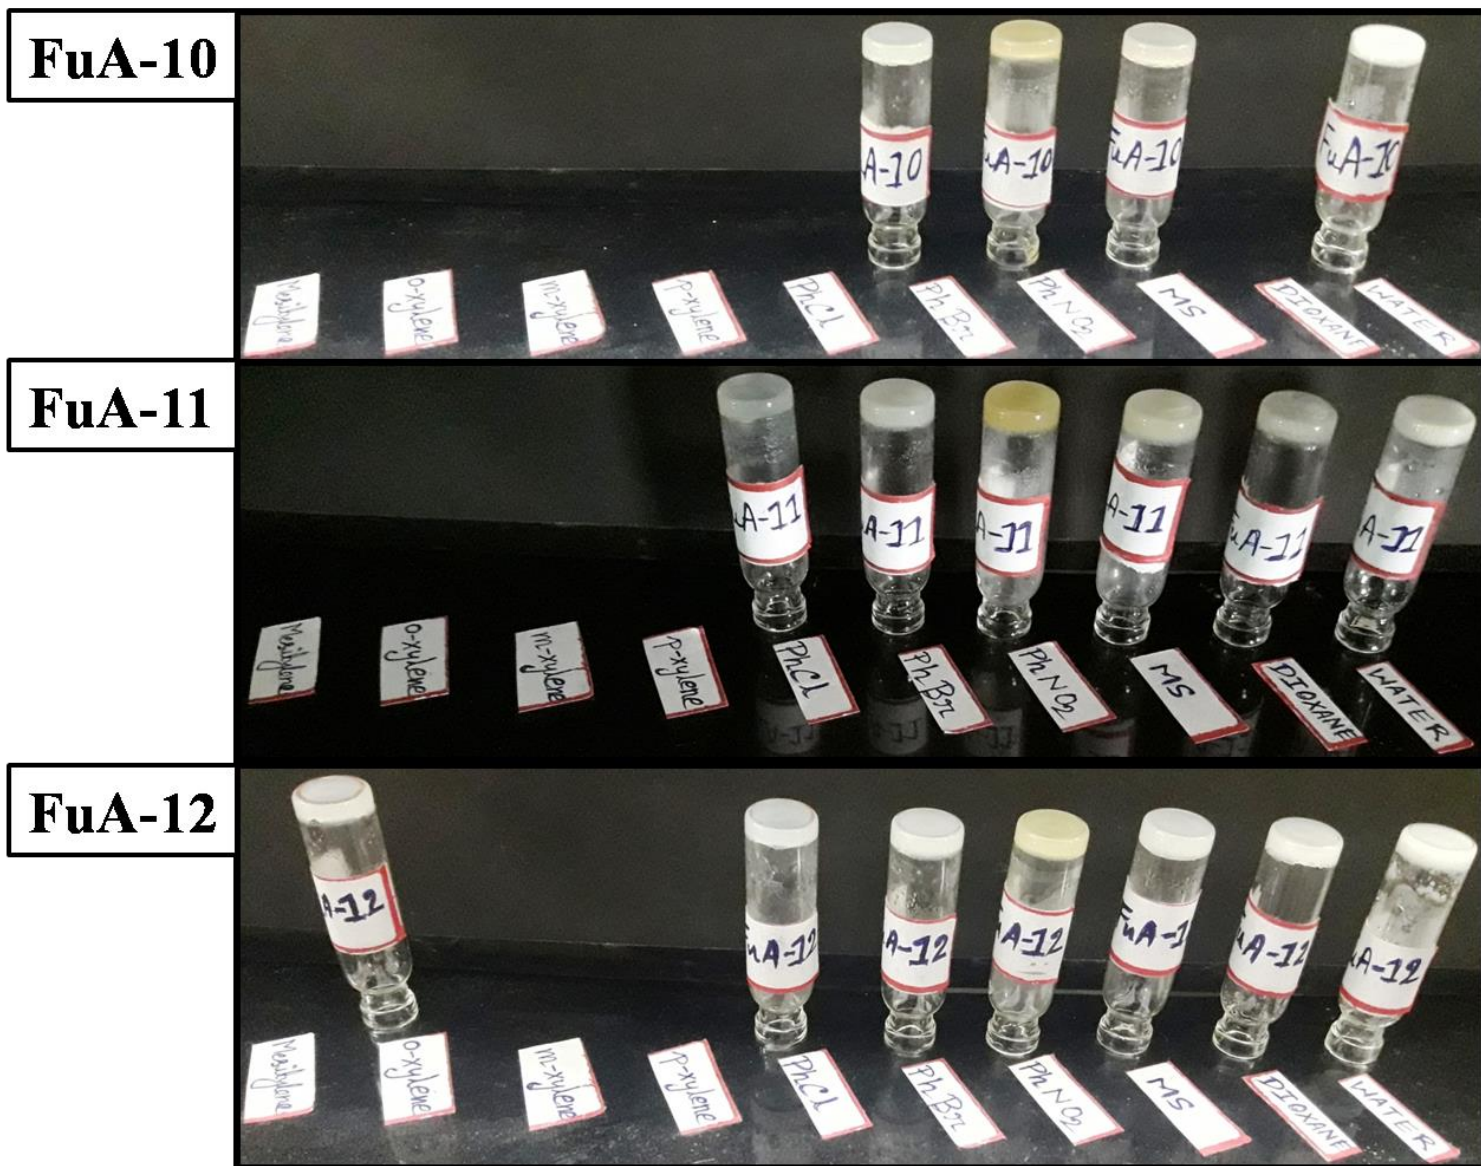

Figure S20(a): Characterization of gels (FuA-10, FuA-11, FuA-12): tube-inversion method.

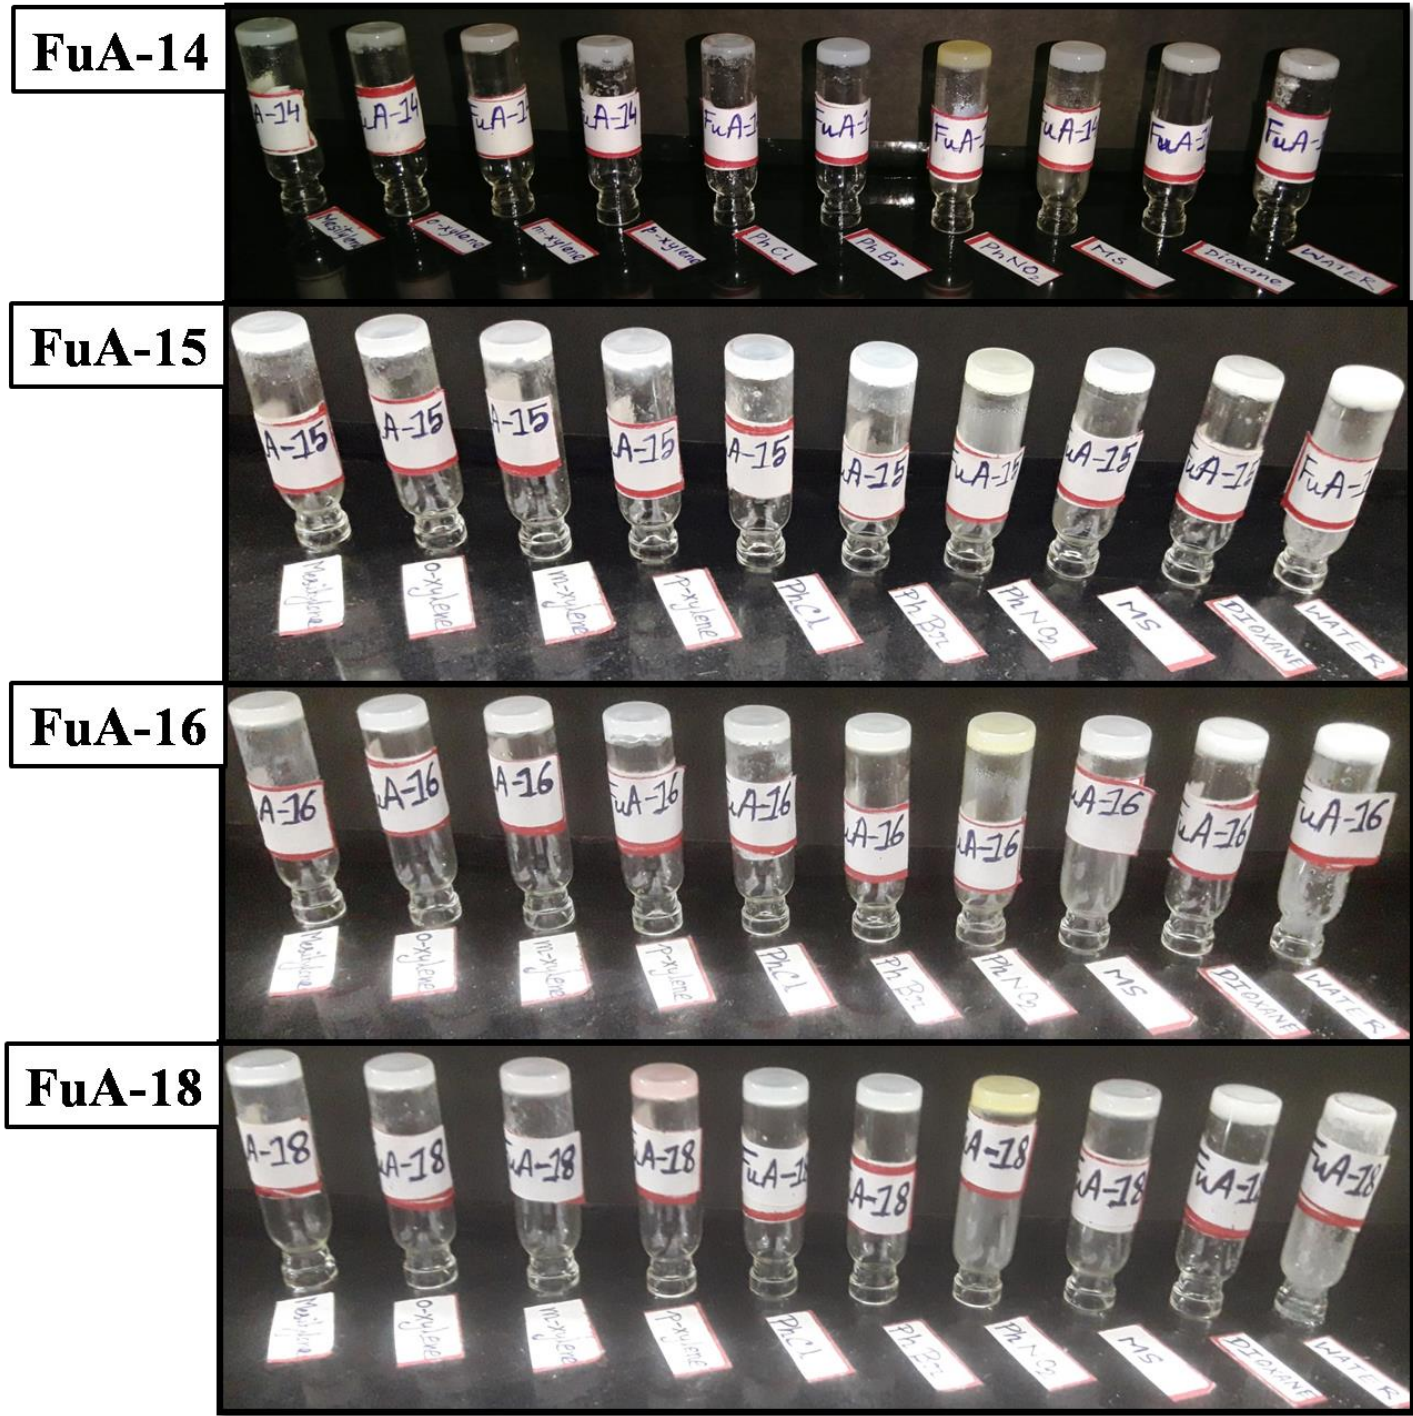

Figure S20(b): Characterization of gels (FuA-14, FuA-15, FuA-16, FuA-18): tube-inversion method.

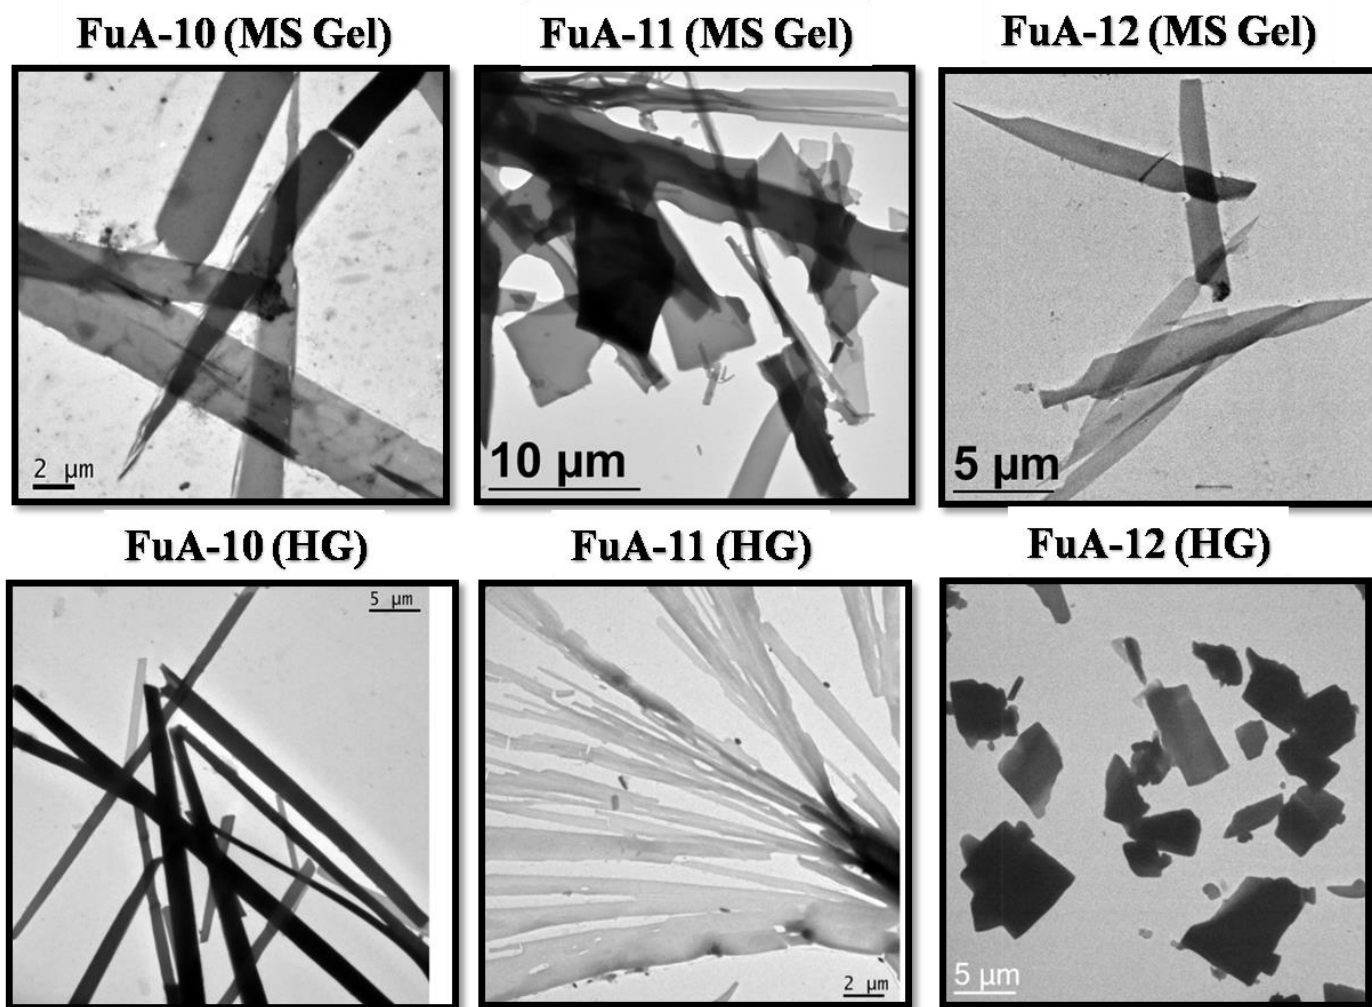

**Figure S21(a):** Morphology of the Gels (Hydro and MS gels of **FuA-10**, **FuA-11**, **FuA-12**) as observed in Transmission Electron Microscopy (TEM).



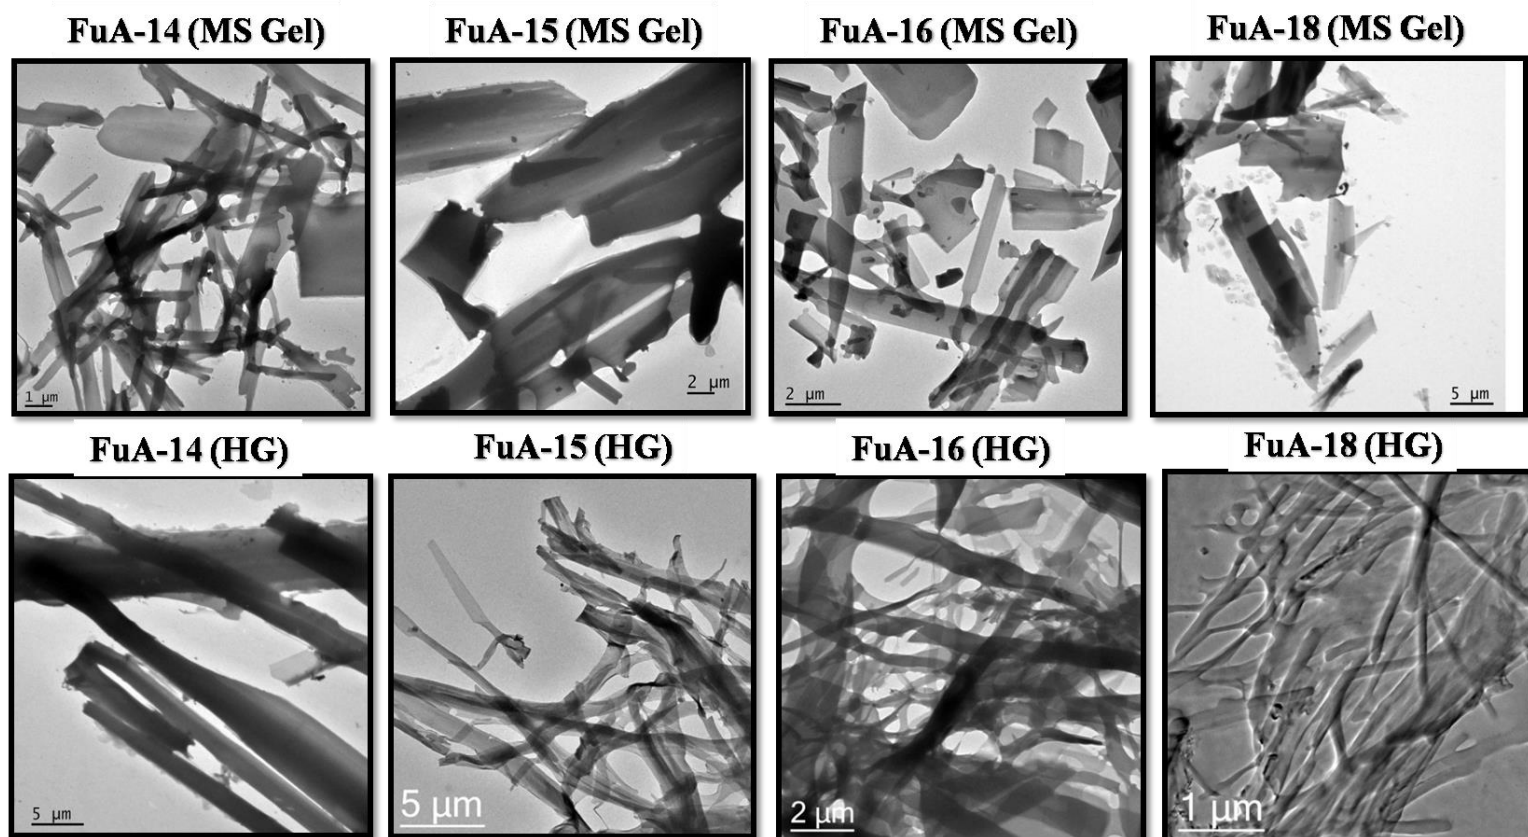

**Figure S21(b):** Morphology of the Gels (Hydro and MS gels of **FuA-14**, **FuA-15**, **FuA-16**, **FuA-18** ) as observed in Transmission Electron Microscopy (TEM).

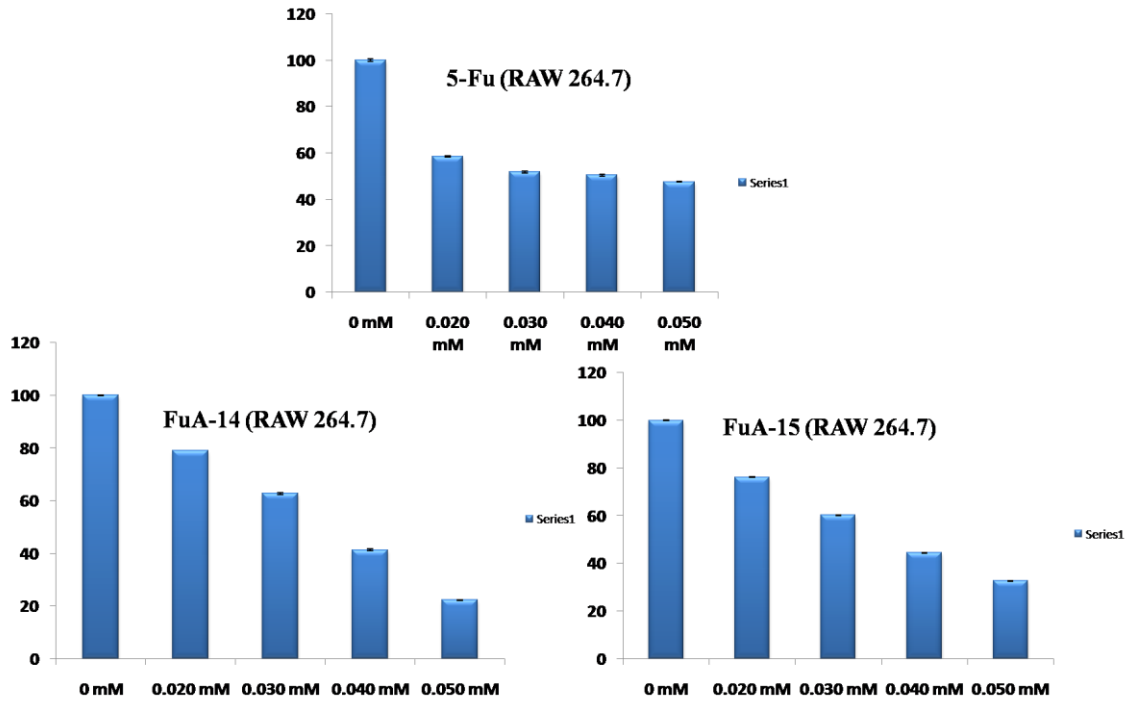

**Figure S22:** Cell viability assay (MTT Assay) done in Raw 264.7 cell line.

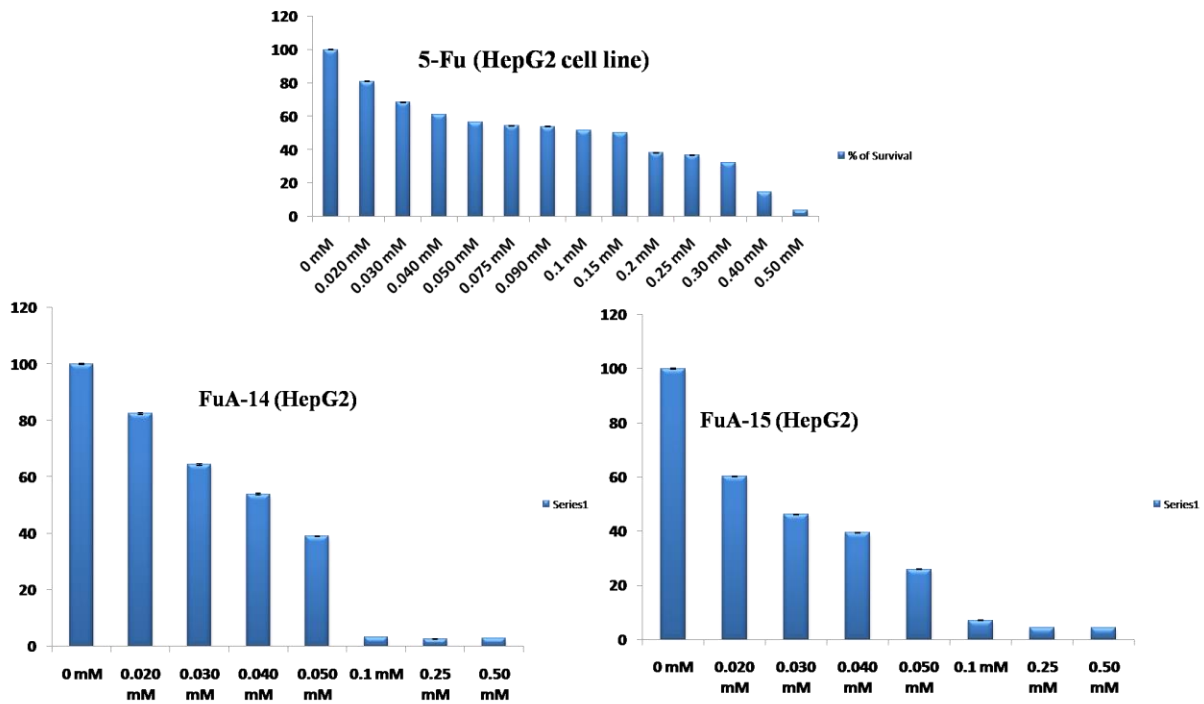

**Figure S23(a):** Cell viability assay (MTT Assay) done in HepG2 cell line.

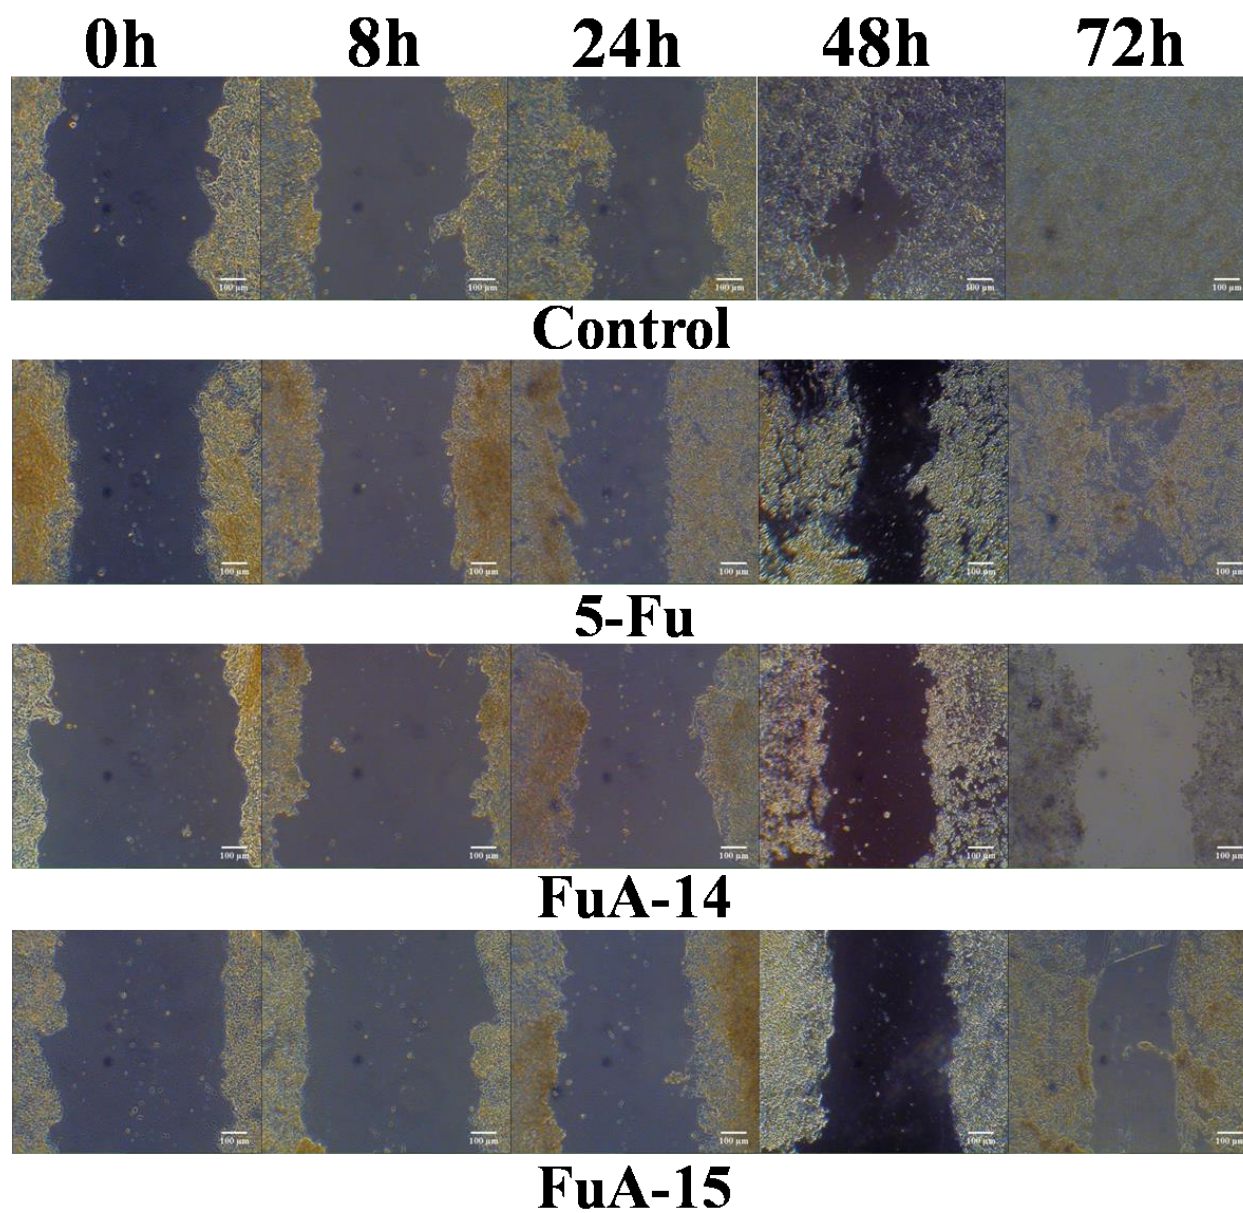

**Figure S23(b):** Cell Migration assay (Scratch Assay) done in HepG2 cell line.

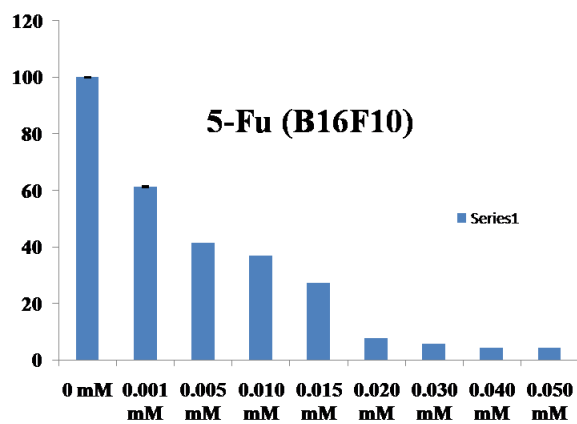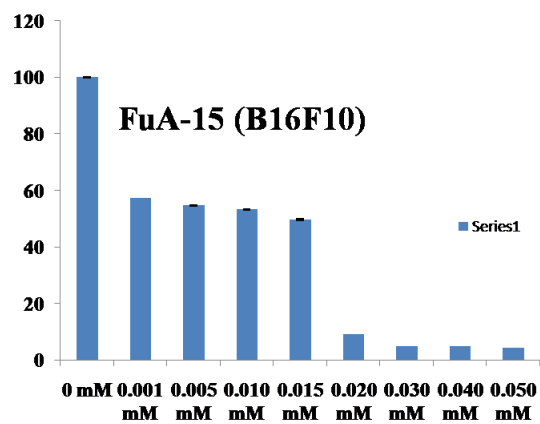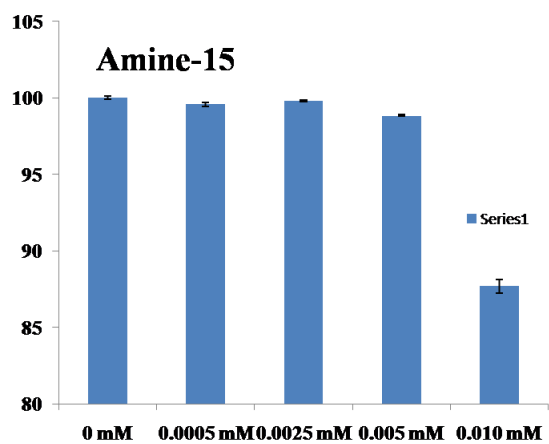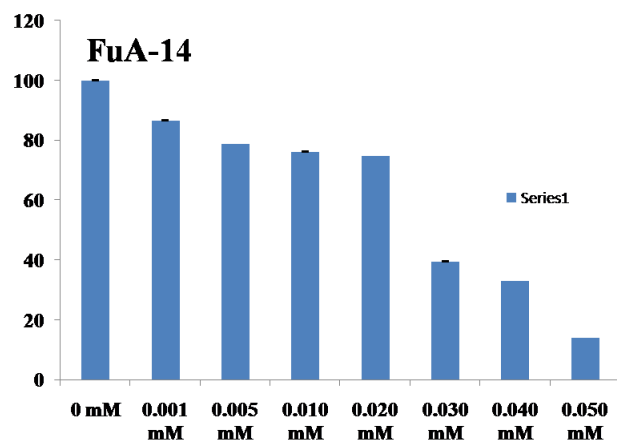

**Figure S24:** Cell viability assay (MTT Assay) done in B16F10 cell line.

**Table S4(a):** Table of comparison of the anticancer behaviour between the mother drug (**5-Fu**) and the salts (**FuA-14** and **FuA-15**) in HepG2 Cell Line

| <b>Compounds</b>     | <b>Concentration (mM)</b> | <b>% of HepG2 cell death</b> | <b>IC50 in RAW 264.7 (mM)</b> |
|----------------------|---------------------------|------------------------------|-------------------------------|
| <b>5-Fu</b>          | <b>0.1</b>                | <b>48.0</b>                  | <b>0.03</b>                   |
| <b>5-Fu</b>          | <b>0.5</b>                | <b>96.0</b>                  | <b>0.03</b>                   |
| <b>FuA-14 (Salt)</b> | <b>0.1</b>                | <b>97</b>                    | <b>0.03</b>                   |
| <b>FuA-15 (Salt)</b> | <b>0.1</b>                | <b>93</b>                    | <b>0.03</b>                   |

**Table S4(b):** Table of comparison of the anticancer behaviour between the mother drug (**5-Fu**) and the salts (**FuA-14** and **FuA-15**) in B16F10 Cell Line

| <b>Compounds</b>     | <b>Concentration (mM)</b> | <b>% of B16F10 cell death</b> |
|----------------------|---------------------------|-------------------------------|
| <b>5-Fu</b>          | <b>0.02</b>               | <b>92</b>                     |
| <b>FuA-14 (Salt)</b> | <b>0.02</b>               | <b>26</b>                     |
| <b>FuA-15 (Salt)</b> | <b>0.02</b>               | <b>91</b>                     |

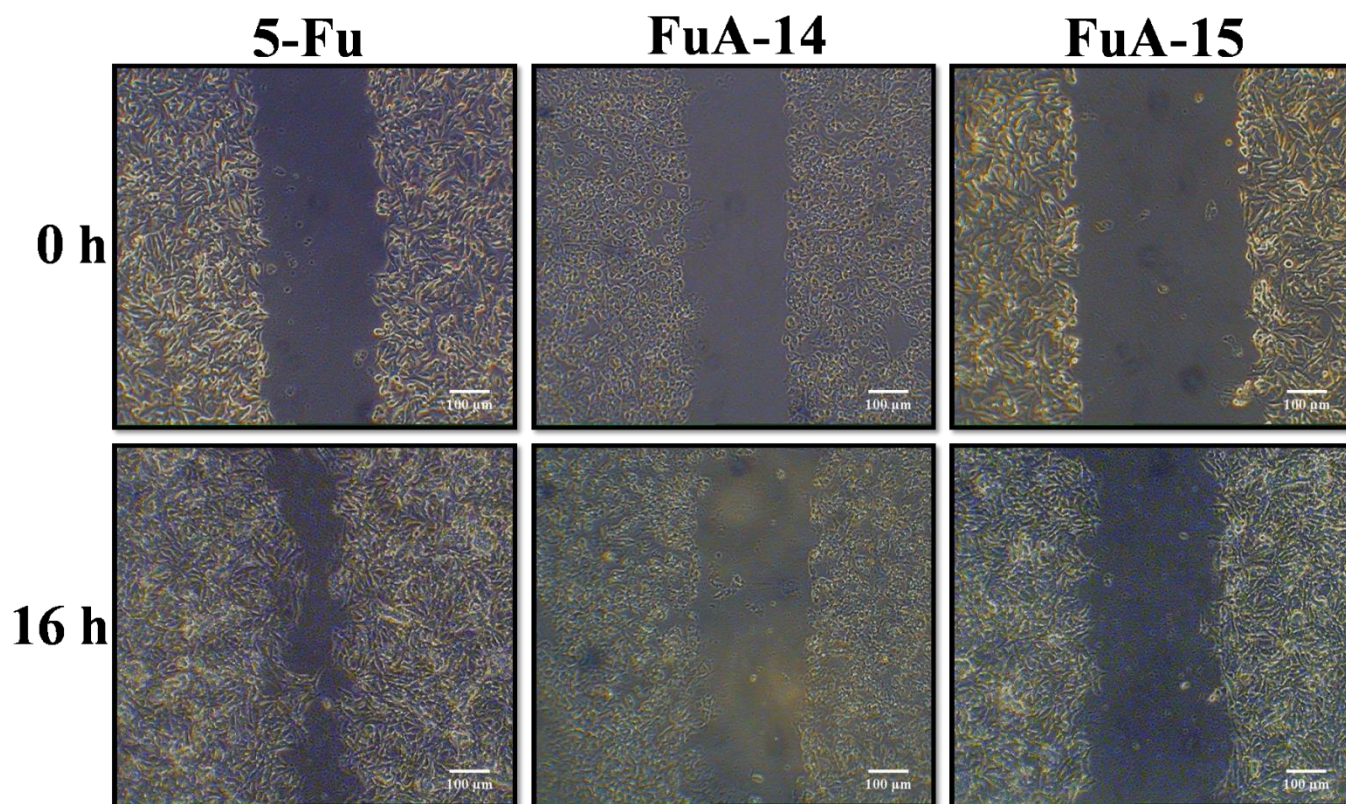

**Figure S25:** The morphology images of cell upon treatment of **5-Fu**, **FuA-14** and **FuA-15** in B16F10 cell line.

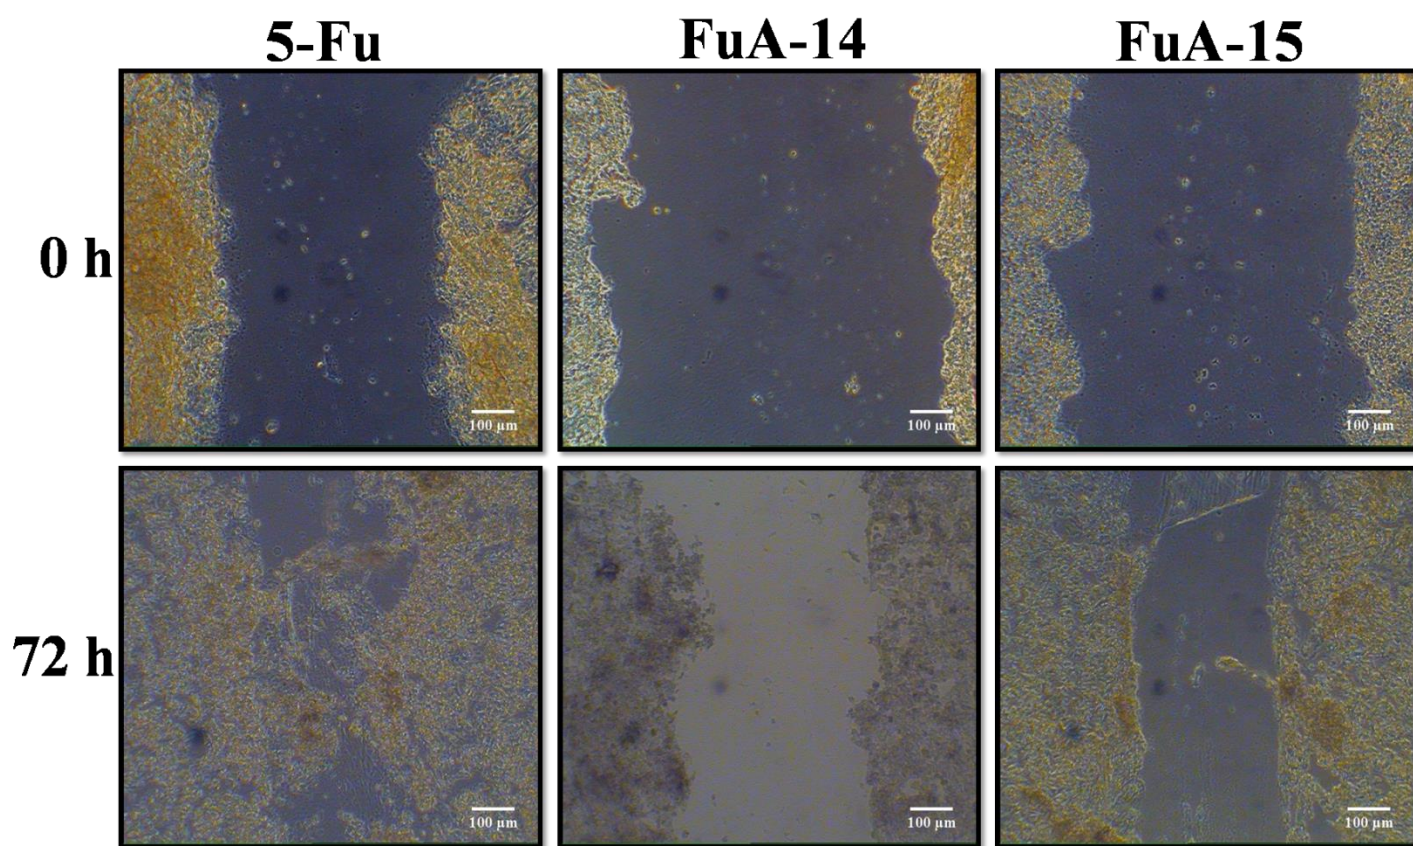

**Figure S26:** The morphology images of cell upon treatment of **5-Fu**, **FuA-14** and **FuA-15** in HepG2 cell line.

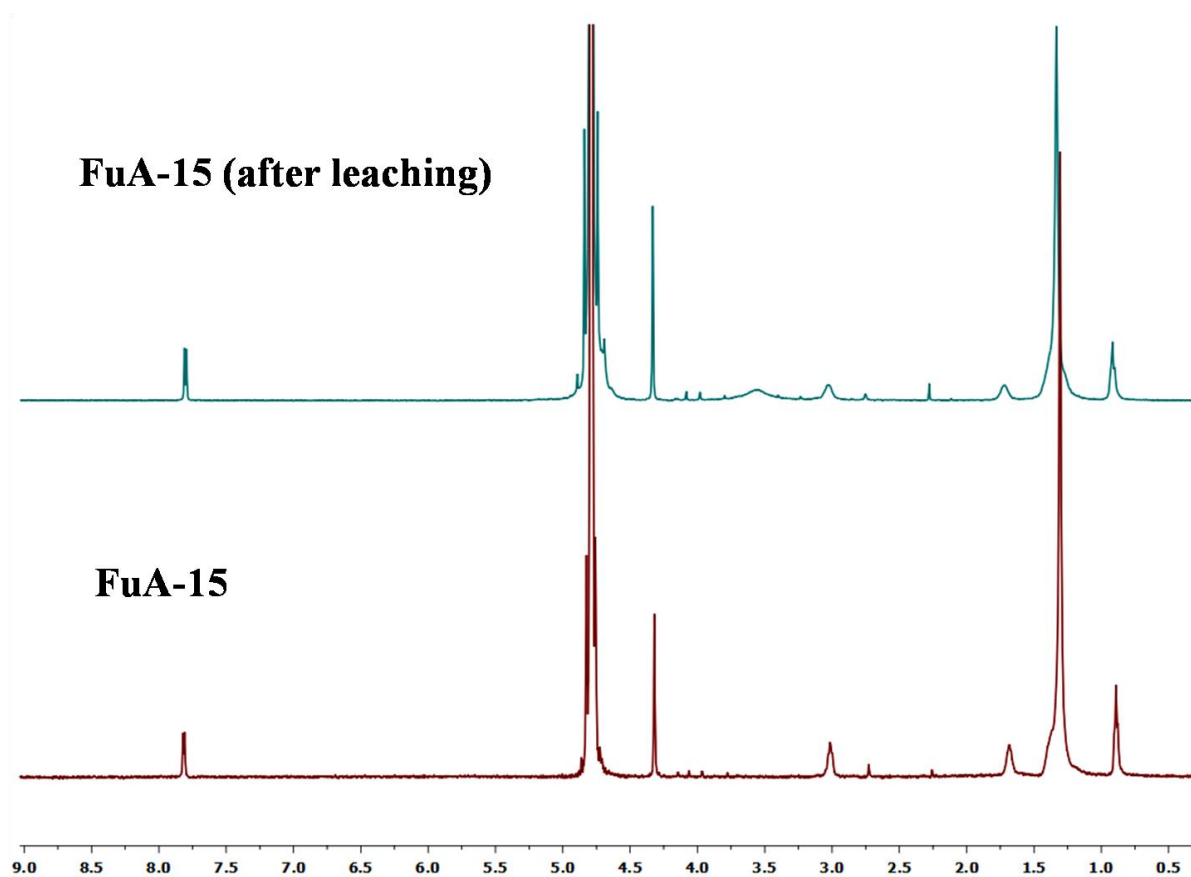

**Figure S27:** NMR Data to prove the existence of **FuA-15** in leached out solution (D<sub>2</sub>O).

#### **Leaching of FuA-15 from the corresponding hydrogel**

To probe the leaching of **FuA-15** from its corresponding hydrogel, <sup>1</sup>H NMR experiments were performed. For this purpose, we prepared a D<sub>2</sub>O gel of FuA-15 (2.5 wt %, 2 mL) and on top of it, 2 mL D<sub>2</sub>O was layered and kept at room temperature for 30 h. The top D<sub>2</sub>O layer was then subjected to <sup>1</sup>H NMR that clearly showed the existence of FuA-15 (Fig. S27).



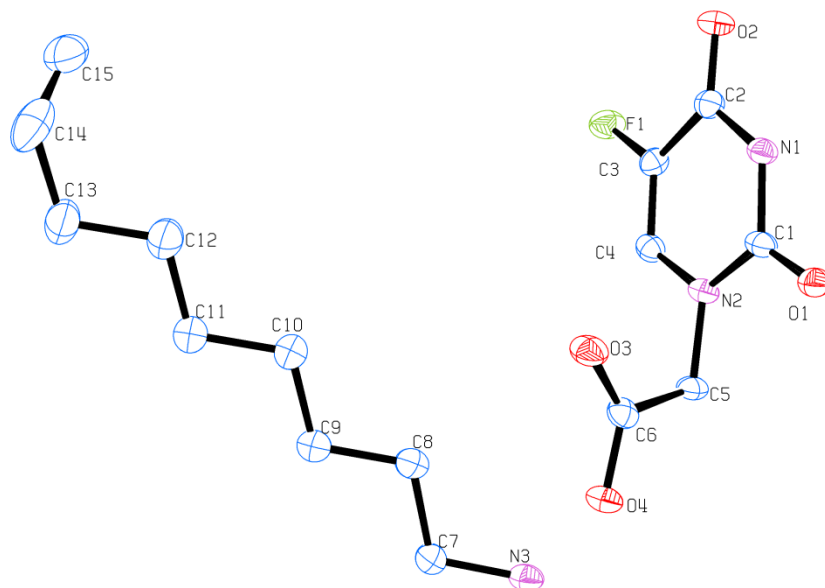

**Figure S28:** ORTEP Plot of **FuA-9** (50% probability).

**Table S5:** Hydrogen Bonding Parameter table of **FuA-9**

| Table S5 : Hydrogen Bonds for <b>FuA-9</b> |          |                 |                 |                  |                  |                    |
|--------------------------------------------|----------|-----------------|-----------------|------------------|------------------|--------------------|
| <b>D</b>                                   | <b>H</b> | <b>A</b>        | <b>d(D-H)/Å</b> | <b>d(H..A)/Å</b> | <b>d(D..A)/Å</b> | <b>&lt;D-H-A/°</b> |
| N3                                         | H3A      | O4 <sup>1</sup> | 0.890           | 1.865            | 2.743            | 168.87             |
| N3                                         | H3B      | O1 <sup>2</sup> | 0.890           | 2.515            | 3.292            | 146.18             |
| N3                                         | H3B      | O2 <sup>3</sup> | 0.890           | 2.442            | 2.940            | 115.76             |
| N3                                         | H3C      | O4              | 0.890           | 1.924            | 2.812            | 175.59             |
| C5                                         | H5A      | O4 <sup>4</sup> | 0.970           | 2.524            | 3.355            | 143.71             |
| C5                                         | H5B      | O3 <sup>5</sup> | 0.970           | 2.429            | 3.295            | 148.49             |
| C4                                         | H4       | O3 <sup>6</sup> | 0.930           | 2.258            | 3.101            | 150.33             |
| C7                                         | H7A      | F1 <sup>7</sup> | 0.970           | 2.587            | 3.278            | 128.37             |
| C7                                         | H7A      | O2 <sup>8</sup> | 0.970           | 2.646            | 3.306            | 125.61             |
| N1                                         | H1       | O1 <sup>9</sup> | 0.968           | 1.822            | 2.789            | 177.38             |

<sup>1</sup>[ x-1, y, z ], <sup>2</sup>[ -x+1, -y, -z ], <sup>3</sup>[ x-1, y-1, z ], <sup>4</sup>[ -x+1, -y, -z ], <sup>5</sup>[ x-1, y, z ], <sup>6</sup>[ x-1, y, z ], <sup>7</sup>[ x, y-1, z ], <sup>8</sup>[ x, y-1, z ], <sup>9</sup>[ -x+2, -y+1, -z ].

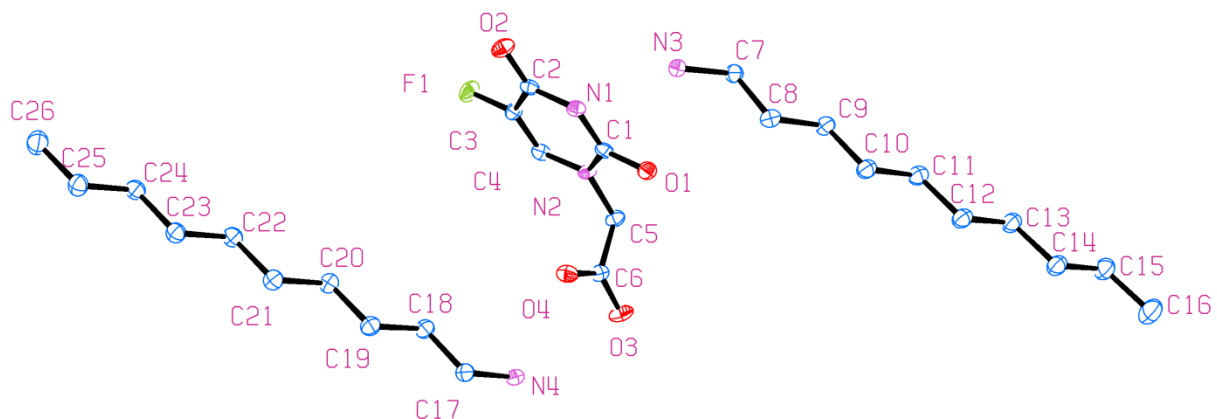

**Figure S29:** ORTEP Plot of **FuA-10** (50% probability).

**Table S6:** Hydrogen Bonding Parameter table of **FuA-10**

| Table S6 : Hydrogen Bonds for <b>FuA-10</b> |                    |                 |          |           |           |          |
|---------------------------------------------|--------------------|-----------------|----------|-----------|-----------|----------|
| D                                           | H                  | A               | d(D-H)/Å | d(H..A)/Å | d(D..A)/Å | <D-H-A/° |
| N3                                          | H3A                | O1              | 0.890    | 2.213     | 2.985     | 144.84   |
| N3                                          | H3A                | N1              | 0.890    | 2.376     | 3.013     | 128.57   |
| N3                                          | H3B                | O3 <sup>1</sup> | 0.890    | 1.890     | 2.740     | 159.21   |
| N3                                          | H3C                | O4 <sup>2</sup> | 0.890    | 1.996     | 2.811     | 151.66   |
| N4                                          | H4AO2 <sup>3</sup> |                 | 0.890    | 1.822     | 2.711     | 176.27   |
| N4                                          | H4A                | N1 <sup>4</sup> | 0.890    | 2.648     | 3.252     | 126.01   |
| N4                                          | H4BO1 <sup>5</sup> |                 | 0.890    | 1.938     | 2.805     | 164.00   |
| N4                                          | H4CO4              |                 | 0.890    | 1.940     | 2.811     | 165.81   |
| C4                                          | H4                 | O3 <sup>6</sup> | 0.930    | 2.339     | 3.264     | 172.92   |
| C7                                          | H7B                | F1 <sup>7</sup> | 0.970    | 2.608     | 3.520     | 156.86   |

<sup>1</sup>[ x-1, y, z ], <sup>2</sup>[ -x+1, -y+1, -z+1 ], <sup>3</sup>[ x+1, y, z ], <sup>4</sup>[ x+1, y, z ], <sup>5</sup>[ -x+2, -y+1, -z+1 ], <sup>6</sup>[ -x+2, -y, -z+1 ], <sup>7</sup>[ -x+1, -y, -z+1 ].

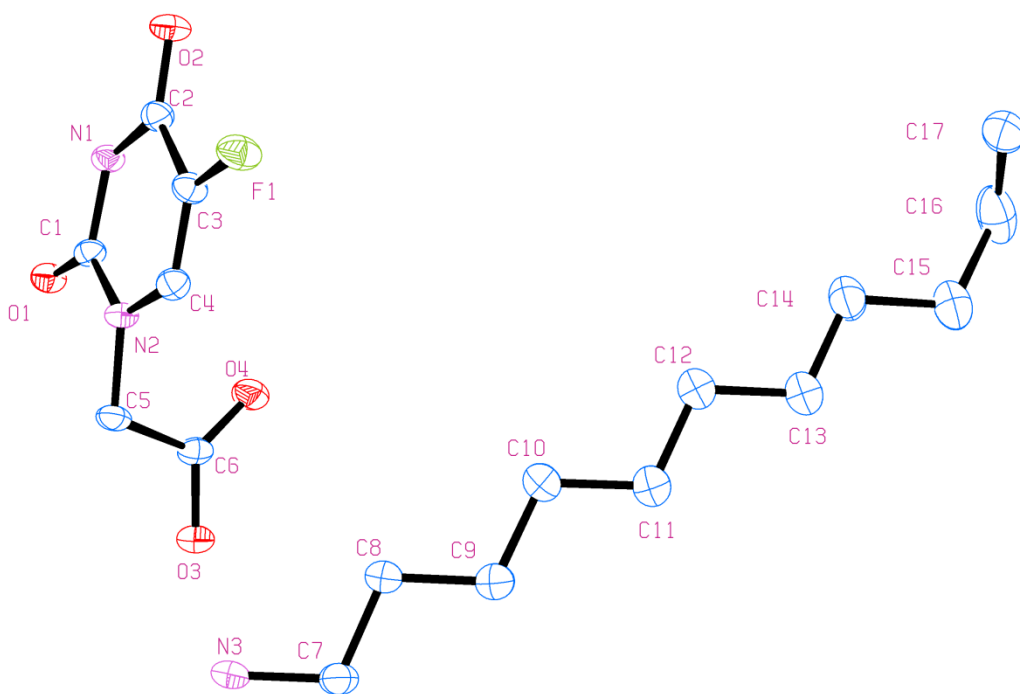

**Figure S30:** ORTEP Plot of **FuA-11** (50% probability).

**Table S7:** Hydrogen Bonding Parameter table of **FuA-11**

| Table S7 : Hydrogen Bonds for <b>FuA-11</b> |     |                 |          |           |           |          |
|---------------------------------------------|-----|-----------------|----------|-----------|-----------|----------|
| D                                           | H   | A               | d(D-H)/Å | d(H..A)/Å | d(D..A)/Å | <D-H-A/° |
| N1                                          | H1  | O1 <sup>1</sup> | 0.880    | 1.920     | 2.800     | 177.35   |
| N3                                          | H3A | O1 <sup>2</sup> | 0.910    | 2.528     | 3.316     | 145.09   |
| N3                                          | H3A | O2 <sup>3</sup> | 0.910    | 2.427     | 2.930     | 114.96   |
| N3                                          | H3B | O3              | 0.910    | 1.905     | 2.814     | 176.45   |
| N3                                          | H3C | O3 <sup>4</sup> | 0.910    | 1.846     | 2.744     | 168.80   |
| C4                                          | H4  | O4 <sup>5</sup> | 0.950    | 2.245     | 3.108     | 150.51   |
| C5                                          | H5A | O3 <sup>6</sup> | 0.990    | 2.502     | 3.353     | 143.89   |
| C5                                          | H5B | O4 <sup>7</sup> | 0.990    | 2.428     | 3.307     | 147.64   |
| C7                                          | H7A | F1 <sup>8</sup> | 0.990    | 2.568     | 3.271     | 127.98   |
| C7                                          | H7A | O2 <sup>9</sup> | 0.990    | 2.647     | 3.306     | 124.20   |

<sup>1</sup>[-x+1, -y+1, -z], <sup>2</sup>[-x, -y, -z], <sup>3</sup>[x-1, y-1, z], <sup>4</sup>[x-1, y, z], <sup>5</sup>[x-1, y, z], <sup>6</sup>[-x, -y, -z], <sup>7</sup>[x-1, y, z], <sup>8</sup>[x, y-1, z], <sup>9</sup>[x, y-1, z].

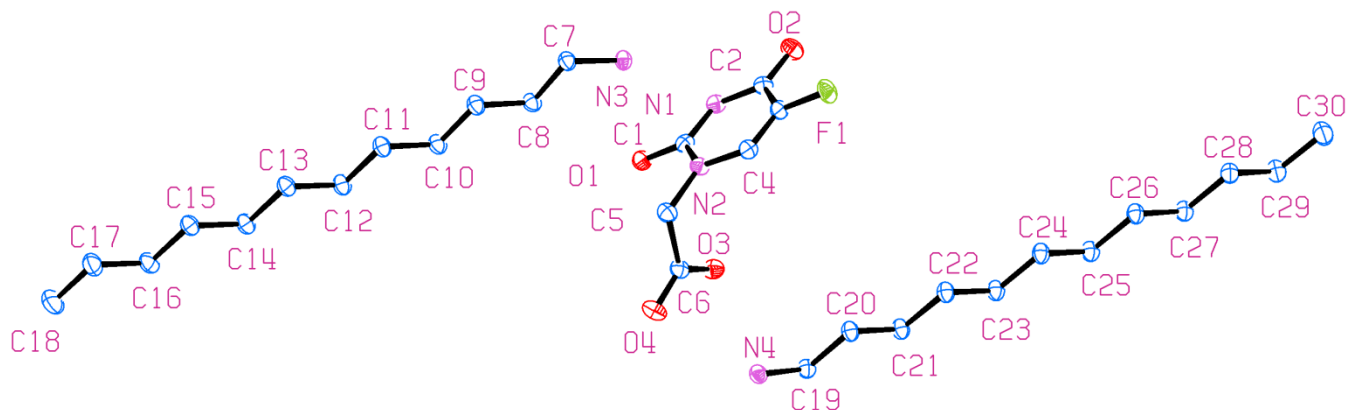

**Figure S31:** ORTEP Plot of **FuA-12** (50% probability).

**Table S8:** Hydrogen Bonding Parameter table of **FuA-12**

| Table S8 : Hydrogen Bonds for <b>FuA-12</b> |     |                 |          |           |           |          |
|---------------------------------------------|-----|-----------------|----------|-----------|-----------|----------|
| D                                           | H   | A               | d(D-H)/Å | d(H..A)/Å | d(D..A)/Å | <D-H-A/° |
| N3                                          | H3A | O3 <sup>1</sup> | 0.910    | 1.962     | 2.804     | 152.99   |
| N3                                          | H3B | O1              | 0.910    | 2.208     | 2.990     | 143.65   |
| N3                                          | H3B | N1              | 0.910    | 2.372     | 3.013     | 127.40   |
| N3                                          | H3C | O4 <sup>2</sup> | 0.910    | 1.869     | 2.736     | 158.34   |
| N4                                          | H4A | O3              | 0.910    | 1.924     | 2.813     | 165.16   |
| N4                                          | H4B | O2 <sup>3</sup> | 0.910    | 1.804     | 2.713     | 176.65   |
| N4                                          | H4B | N1 <sup>4</sup> | 0.910    | 2.642     | 3.254     | 125.31   |
| N4                                          | H4C | O1 <sup>5</sup> | 0.910    | 1.923     | 2.809     | 164.16   |
| C4                                          | H4  | O4 <sup>6</sup> | 0.950    | 2.317     | 3.262     | 172.84   |
| C7                                          | H7B | F1 <sup>7</sup> | 0.990    | 2.602     | 3.532     | 156.35   |

<sup>1</sup>[-x+1, -y+1, -z+1], <sup>2</sup>[x-1, y, z], <sup>3</sup>[x+1, y, z], <sup>4</sup>[x+1, y, z], <sup>5</sup>[-x+2, -y+1, -z+1], <sup>6</sup>[-x+2, -y, -z+1], <sup>7</sup>[-x+1, -y, -z+1].

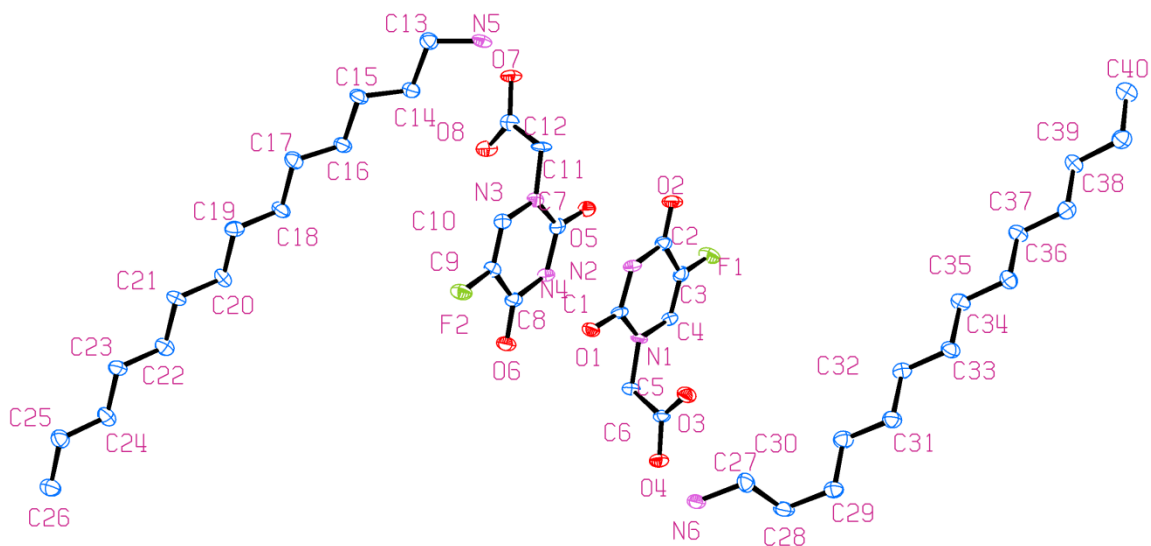

**Figure S32:** ORTEP Plot of **FuA-14** (50% probability).

**Table S9:** Hydrogen Bonding Parameter table of **FuA-14**

| Table S9 : Hydrogen Bonds for <b>FuA-14</b> |                    |                  |          |           |           |          |
|---------------------------------------------|--------------------|------------------|----------|-----------|-----------|----------|
| D                                           | H                  | A                | d(D-H)/Å | d(H..A)/Å | d(D..A)/Å | <D-H-A/° |
| N2                                          | H2                 | O5               | 0.880    | 1.974     | 2.854     | 177.42   |
| N4                                          | H4                 | O1               | 0.880    | 1.900     | 2.779     | 178.15   |
| N5                                          | H5A                | O7               | 0.910    | 1.882     | 2.776     | 167.07   |
| N5                                          | H5B                | O1 <sup>1</sup>  | 0.910    | 2.556     | 3.322     | 142.06   |
| N5                                          | H5B                | O6 <sup>2</sup>  | 0.910    | 2.479     | 2.986     | 115.51   |
| N5                                          | H5C                | O7 <sup>3</sup>  | 0.910    | 1.938     | 2.845     | 174.68   |
| N6                                          | H6A                | O4 <sup>4</sup>  | 0.910    | 2.003     | 2.819     | 148.41   |
| N6                                          | H6B                | O2 <sup>5</sup>  | 0.910    | 2.644     | 3.123     | 113.72   |
| N6                                          | H6C                | O4               | 0.910    | 1.865     | 2.767     | 170.87   |
| C10                                         | H10O8 <sup>6</sup> |                  | 0.950    | 2.256     | 3.120     | 150.79   |
| C11                                         | H11A               | O4 <sup>7</sup>  | 0.990    | 2.414     | 3.276     | 145.21   |
| C11                                         | H11B               | O8 <sup>8</sup>  | 0.990    | 2.383     | 3.290     | 152.03   |
| C5                                          | H5D                | O3 <sup>9</sup>  | 0.990    | 2.374     | 3.280     | 151.95   |
| C5                                          | H5E                | O7 <sup>10</sup> | 0.990    | 2.513     | 3.349     | 142.02   |
| C4                                          | H4A                | O3 <sup>11</sup> | 0.950    | 2.239     | 3.105     | 151.24   |
| C14                                         | H14B               | O8               | 0.990    | 2.459     | 3.403     | 159.31   |
| C28                                         | H28B               | F1 <sup>12</sup> | 0.990    | 2.528     | 3.467     | 158.35   |
| C13                                         | H13A               | F2 <sup>13</sup> | 0.990    | 2.579     | 3.244     | 124.44   |
| C27                                         | H27B               | O3               | 0.990    | 2.615     | 3.352     | 131.23   |

<sup>1</sup>[ x, y+1, z ], <sup>2</sup>[ x, y+1, z ], <sup>3</sup>[ x+1, y, z ], <sup>4</sup>[ x-1, y, z ], <sup>5</sup>[ x-1, y-1, z ], <sup>6</sup>[ x-1, y, z ], <sup>7</sup>[ x-1, y+1, z ], <sup>8</sup>[ x-1, y, z ], <sup>9</sup>[ x+1, y, z ], <sup>10</sup>[ x+1, y-1, z ], <sup>11</sup>[ x+1, y, z ], <sup>12</sup>[ x-1, y-1, z ], <sup>13</sup>[ x+1, y+1, z ].

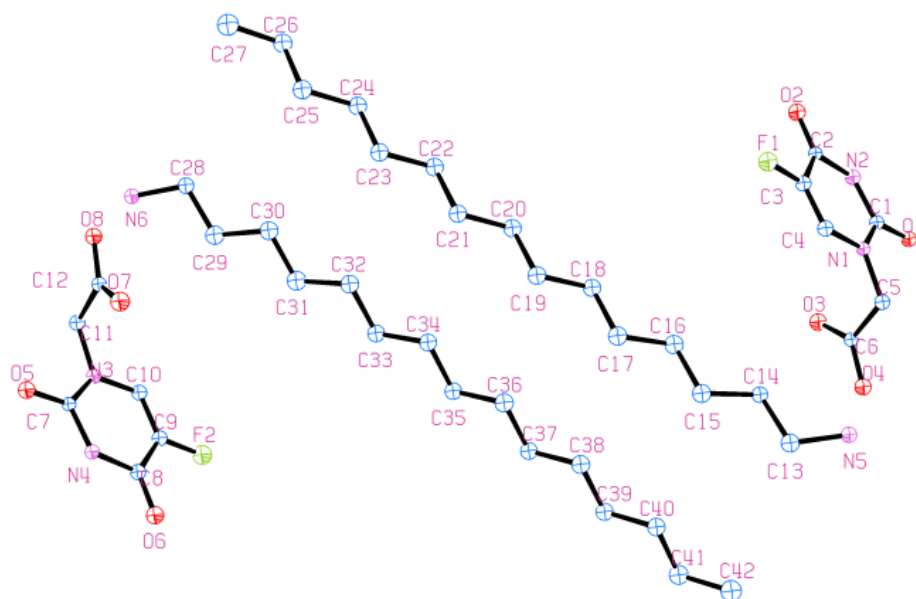

**Figure S33:** ORTEP Plot of **FuA-15** (50% probability).

**Table S10:** Hydrogen Bonding Parameter table of **FuA-15**

| Table S10 : Hydrogen Bonds for <b>FuA-15</b> |                      |                  |          |           |           |          |
|----------------------------------------------|----------------------|------------------|----------|-----------|-----------|----------|
| D                                            | H                    | A                | d(D-H)/Å | d(H..A)/Å | d(D..A)/Å | <D-H-A/° |
| N4                                           | H4A                  | O5 <sup>1</sup>  | 0.880    | 1.931     | 2.810     | 177.94   |
| N5                                           | H5A                  | O1 <sup>2</sup>  | 0.910    | 2.519     | 3.259     | 138.78   |
| N5                                           | H5A                  | O2 <sup>3</sup>  | 0.910    | 2.543     | 2.992     | 110.98   |
| N5                                           | H5B                  | O4 <sup>4</sup>  | 0.910    | 1.867     | 2.773     | 173.94   |
| N5                                           | H5C                  | O4               | 0.910    | 1.947     | 2.854     | 174.60   |
| N6                                           | H6A                  | O8 <sup>5</sup>  | 0.910    | 1.924     | 2.828     | 172.36   |
| N6                                           | H6BO6 <sup>6</sup>   |                  | 0.910    | 2.450     | 2.948     | 114.63   |
| N6                                           | H6BO5 <sup>7</sup>   |                  | 0.910    | 2.512     | 3.259     | 139.55   |
| N6                                           | H6CO8                |                  | 0.910    | 1.890     | 2.785     | 167.07   |
| N2                                           | H2                   | O1 <sup>8</sup>  | 0.880    | 1.930     | 2.809     | 176.94   |
| C14                                          | H14B                 | O3 <sup>9</sup>  | 0.990    | 2.398     | 3.340     | 158.72   |
| C4                                           | H4                   | O3 <sup>10</sup> | 0.950    | 2.244     | 3.106     | 150.46   |
| C11                                          | H11A                 | O8 <sup>11</sup> | 0.990    | 2.455     | 3.321     | 145.76   |
| C11                                          | H11BO7 <sup>12</sup> |                  | 0.990    | 2.346     | 3.248     | 151.00   |
| C10                                          | H10                  | O7 <sup>13</sup> | 0.950    | 2.231     | 3.080     | 148.34   |
| C5                                           | H5D                  | O3 <sup>14</sup> | 0.990    | 2.414     | 3.313     | 150.63   |
| C5                                           | H5E                  | O4 <sup>15</sup> | 0.990    | 2.476     | 3.328     | 143.97   |
| C29                                          | H29A                 | O7 <sup>16</sup> | 0.990    | 2.611     | 3.179     | 116.55   |

<sup>1</sup>[-x+2, -y+1, -z+1], <sup>2</sup>[-x+1, -y+1, -z], <sup>3</sup>[x+1, y-1, z], <sup>4</sup>[x+1, y, z], <sup>5</sup>[x-1, y, z], <sup>6</sup>[x-1, y+1, z], <sup>7</sup>[-x+1, -y+2, -z+1], <sup>8</sup>[-x, -y+2, -z], <sup>9</sup>[x+1, y, z], <sup>10</sup>[x+1, y, z], <sup>11</sup>[-x+1, -y+2, -z+1], <sup>12</sup>[x-1, y, z], <sup>13</sup>[x-1, y, z], <sup>14</sup>[x+1, y, z], <sup>15</sup>[-x+1, -y+1, -z], <sup>16</sup>[x-1, y, z].
